# Supplementary material for: Paediatric reference intervals for 17 Roche cobas 8000 e602 immunoassays in the CALIPER cohort of healthy children and adolescents
Source: publisher site journal article supplement (doi:10.1515/cclm-2019-0707), 2019-08-04
Supplement: Supplementary file 2 [file Supplementary Raw Database Filev2.xlsx]

## Sheet: Details
Age	Gender	AFP (μg/L)	Cortisol (nmol/L)	Estradiol (pmol/L)	Ferritin (pmol/L)	Folate (nmol/L)	FSH (IU/L)	FT3 (pmol/L)	FT4 (pmol/L)	LH (IU/L)	Progesterone (nmol/L)	Prolactin (mIU/L)	PTH (pmol/L)	SHBG (nmol/L)	Testosterone (nmol/L)	TSH (mIU/L)	TT3 (nmol/L)	Vitamin B12 (pmol/L)
0.00273973	Male	1210							39.54			5470.21			18.91
0.00273973	Male	1210	64.11		493.71				25.28			16306.4
0.00273973	Male	1210			482.923				39.62			7304.26
0.00273973	Male	1210							39.9			16436.2			8.95
0.00273973	Male	1210		213.2
0.00273973	Male	1210		162.3	586.969				40.79			8204.26
0.00273973	Male														10.63
0.00273973	Male				381.575													346.2
0.00273973	Male			141.1
0.00273973	Male				1443.6				41.5			5146.81						494.9
0.00273973	Male				2136.41				38.24			8527.66
0.00273973	Male				662.699									39.55				416.5
0.00273973	Male										682.5
0.00273973	Male									0.393			3.05	25.95
0.00273973	Male									2.72				66.29				485.9
0.00273973	Male						0.1	11.96						27.04	7.13
0.00273973	Male										474				11.51
0.00273973	Male		115.8					11.24										628.4
0.00273973	Male		334.6	98.12				10.44
0.00273973	Male		47.18	211.8				11.81			140
0.00273973	Male		138.6	172.9				9.79			663.5					11.82
0.00273973	Male									0.1
0.00273973	Male						0.113			0.1	790.5
0.00273973	Male												2.28					230.7
0.00273973	Male													38.69				1308
0.00273973	Male						3.17			5.46								648.7
0.00273973	Male						0.117			0.1
0.00273973	Male										86.38
0.00273973	Male						0.1			0.1								735.2
0.00273973	Male						0.111
0.00273973	Male									0.157	502.8
0.00273973	Male									0.1	295.7
0.00273973	Male
0.00273973	Male															23.59
0.00273973	Male						0.249
0.00273973	Male						1.02
0.00273973	Male						0.465						1.23			23.76
0.00273973	Male										402.3
0.00273973	Male												3.05			9.79
0.00273973	Male												0.432
0.00273973	Male												1.73
0.00273973	Male												2.8			15.91
0.00273973	Male												4.97			15.65
0.00273973	Male															17.53
0.00273973	Male															2.01
0.00273973	Male												3.38			16.22
0.00273973	Female			174.9
0.00273973	Female														8.84
0.00273973	Female														11.04
0.00273973	Female			295.6										59.39
0.00273973	Female	1210	119.1	407.8	1149.67			12.72	44.3			15908.5			6.81
0.00273973	Female	1210
0.00273973	Female	1210		220.1	977.083				41.69			8855.32			8.18
0.00273973	Female	1210			1082.25							7570.21			6.9
0.00273973	Female			211.8
0.00273973	Female				725.846
0.00273973	Female		182.9	174.7											8.18
0.00273973	Female														12.59
0.00273973	Female				1040.23				47.12			13544.7
0.00273973	Female								29.96
0.00273973	Female		181.2	312.1	1339.33				41.48			5863.83
0.00273973	Female								21.88
0.00273973	Female			180.5	1237.08				37.47			13904.3			6.39
0.00273973	Female			261	1411.69				32.9			9174.47			10.11
0.00273973	Female		66.87									5155.32	4.52		8.26	5.32
0.00273973	Female			232.7	654.834									28.93
0.00273973	Female		74.81					12.25						51.74
0.00273973	Female		35.65					10.05			180.3			37.25				497.2
0.00273973	Female		217.6											28.42
0.00273973	Female		97.35											55.62				421
0.00273973	Female		71.78					9.65		0.1	187.8			27
0.00273973	Female		40.95					11.32		0.1	548			41.04
0.00273973	Female							11.84		0.1								815.1
0.00273973	Female							8.75
0.00273973	Female							9.1
0.00273973	Female									0.137	142.5					19.08
0.00273973	Female									0.1	389.7
0.00273973	Female				902.476							7548.94
0.00273973	Female																	972.8
0.00273973	Female																	470.5
0.00273973	Female									0.1	489.2					16.74		748
0.00273973	Female								30.05			13063.8		35.84
0.00273973	Female																	326.4
0.00273973	Female																	452.4
0.00273973	Female
0.00273973	Female									0.1
0.00273973	Female										444.5							446
0.00273973	Female								36.29
0.00273973	Female		83.17					12.18						24.22	5.88
0.00273973	Female									3.39			3.28
0.00273973	Female									0.1
0.00273973	Female															16.4
0.00273973	Female															9.53
0.00273973	Female												2.68			20.5		137.7
0.00273973	Female										753.4					35.17		146.7
0.00273973	Female												1.46
0.00273973	Female												4.26
0.00273973	Female												2.43
0.00273973	Female												4.08
0.00273973	Female															9.82
0.00273973	Female												2.33
0.00273973	Female										138.7					5.98
0.00273973	Female										233.1
0.00273973	Female												2.18
0.00273973	Female										184.2		4.38			13.39		894.9
0.00833333	Female	1210	28.64		3067.43			5.68				1952.34		77.95	3.94
0.0111111	Male	1210	99.45	63.93	1328.77		0.1	6.49	29.62	0.1	214.1	1225.53	6.03	73.25	6.11	7.14
0.0111111	Male	1210	41.68	68.41	1156.86		0.279	6.01	31.28	0.494	162.7	1337.23	4.35	81.12	4.86	3.67
0.0111111	Male	1210	41	18	595.508	45.4	1.6	6.7	31	2	9	4595.75	1.2	54.5	3.2	3.01	2.55	1060
0.0138889	Male	1210	109.2	59.09	847.419			5.99	28.88			7319.15		74.82	6.11
0.0166667	Male	1210	30.97		740.902			5.62	28.28			3280.85		65.53	4.71			682.3
0.0166667	Male	1210	626.9	61.75	332.586			3.95	21.26			2912.77		22.77	3.55			476.2
0.0166667	Female	1210		54.91	2424.73		3.66	8.58	22.96	8.47		3259.58	2.79	200		1.59
0.0194444	Male	1210	143.7	44.68	1135.73			6.66	24.18			4306.38		69.57	2.69			681.7
0.0222222	Male	1210	210	26	1044.95	35.21	1.7	7	23		11	4638.3	1.1	121.9	5.3	6.03	2.63	336
0.0222222	Male	1210	37.89	20.96	515.508		1.98	8.16	28.49		307.6	124.468	1.9	116.6	2.51	4.17		1210
0.0222222	Female			75.37			5.73	5.35	22.36	1.09			1.58			4.94
0.025	Male		28.91				2.16				6.51		1.55		11.82	10.01
0.0361111	Male	1210	140	18	957.307	42.99	1.7	7.1	21	4.2	8	4106.38	1	141.3	16	7.86	2.89	342
0.0416667	Male	1210	34.74	48.12	2593.27		3.68	8.41	22.86		154.9	57.6596	2.86	200	24.49	1.6		631.1
0.0416667	Female	1210	41.54	36.39	496.406		14.28	7.39	22.18	7.56	8.56	2251.06	4.84	65.23	3.92	1.57		124.2
0.0444444	Female	1210	27	18	829.217	45.4	10	6.8	19	0.4	3	2808.51	1.4	200	0.5	2.84	2.68	598
0.0472222	Male	1210	21	18	1020.23	42.85	1.4	7.8	19	3.9	6	2063.83	1.2	92.6	3.2	3.74	2.77	436
0.0472222	Male	1210	15	18	570.789	45.4		7	20		3	3042.55	2.6	156.1	10	5.31	3.01	275
0.0472222	Female	1210	68	19	871.914	45.4		7.9	24	0.1	3	3276.6	3.6	73.4	0.8	8.23	2.77	626
0.05	Male	1210	343.2	18.35	922.925			7.12	22.29		76.43	211.489	7.48	155.6	10.64	6.87
0.0583333	Female	1210	44.69	51.81	984.948		7.99	6.58	19.27	0.558	4.28	3251.06	1.05	104.4	1.73	6.91		277.9
0.0583333	Female	1210	67.97	18.35	1425.4		12.84	3.99	18.5	0.453	4.56	1382.55	2.44	199.5	1.43	2.52		1215
0.0583333	Female						7.52			2.61	4.24
0.0638889	Male	1210	81.33	20.78	441.575		1.57	7.91	21.6	5	110.4	132.128	2.75	93.94	4.47	3.15
0.0666667	Female	1210	77.23	84.12			1.79	5.8		0.341	3.49	280	4.19	123.5	3.88	8.7		422.2
0.0722222	Male	1210	11.47	18.35	441.575		2.78	8.96	20.13		113.6	21.0638	3.37	118.3	9.64	6.15		601.5
0.0722222	Male		239.5	18.35			2.13	8.4		5.15	5.35		1.85	188.2	5.11	2.26
0.0722222	Male		232.8	20.22			2.14	8.52		5.2	5.36		1.83	186.4	5.11	2.25
0.0722222	Female	241.274	120	18	1314.61	45.4	25	7.7	21	0.7	3	1106.38	2.3	135.7	1.2	1.67	3.34	479
0.0722222	Female	1210	66.42	18.35	544.946		2.06	8.36	19.08	0.1	2.62	1203.19	2.83	200	0.272	3.18		357.2
0.075	Female	1210	43.14	119.1	518.429		7.34	6.03		3.39	10.32	3644.68	2.44	99.9	8.49	3.03		312.3
0.0777778	Male	1210	98	18	997.757		1.3	5.6	19	3.5	4	1531.92	5.4	59.2	2.3	3.26	2.52	629
0.0777778	Male	1210	170	18	835.958	45.4	1.4	7.2	18	3.6	3	2723.4	1.7	141.3	4.4	3.29	2.94	268
0.0777778	Male	1210	113.7	18.35	436.182		1.32	8.16	19.89	2.63	42.21	47.6596	4.26	173	6	3.17		1476
0.0777778	Female	27.5		18			7.5			0.1	6	2276.6		156.7	0.4			437.6
0.0777778	Female	1210	260.3	37.58	722.924			10.03		0.1	6.24	1041.49	1.61	192.4	0.332	2.85		286.7
0.0833333	Female		97.32	38.47			2.4		26.06	0.1	2.8	886.596	4.28	125.5	0.941	2.78		1173
0.0888889	Male	1210		18.35	445.844			5.17				632.979		103.4
0.0916667	Male	1210	120	18	602.25	45.4	2.2	6.2	19	5.6	2	1000	1.1	108.7	3.6	7.17	3.07	278
0.0944444	Female	1210		63			3.5			0.4	5	893.617		124.6	2			480.8
0.0944444	Female	1210	16	85	898.88	18.13	5.8	8.6	17	4.6	2	1297.87	4.2	116.5	1.8	1.6	3.22	293
0.105556	Female	1210	17	18	296.63	32.15	2.5	6.4	16	0.3	2	617.021	2	81.4	0.2	3.25	2.48	434
0.111111	Female	638.275	36	49	889.891	34.53	3.2	7.2	22	0.3	2	617.021	1.8	128.3	0.2	1.81	2.9	279
0.113889	Female	902.055	33	18	779.778	45.4	2.3	7.4	20	0.2	4	1255.32	4.1	85.9	1.1	6.19	3.05	312
0.116667	Male	1210	110	18	1831.47	35.9	3.2	5.9	19	3.7	2	1042.55	3.6	179.2	9	2.68		288
0.119444	Female	1210	32	18	269.664	45.4	2.5	7.9	21	0.1	4	1000	2.4	197.5	1	4.81	2.92	520
0.136111	Male	1210	42	18	294.383	45.4	2.3	5.6	19	2.9	14	914.894	5.1	200	9.3	2.9	1.95	257
0.136111	Male	800.778	61	18	649.441	44.21	1.2	7	17	1.1	8	382.979	1.6	117.7	1.8	3.83	3.1	204
0.136111	Male	226.754	240	18	653.935	12.69	1.8	7.9	20	5.1	3	148.936	2.1	118.9	8.8	2.84		245
0.141667	Female	983.125	24	18	440.451	42.85	6	7.4	19	0.2	2	787.234	3.8	200	0.5	4.67	2.47	335
0.144444	Male	137.456	87	18	588.766	45.4	1.2	6.2	19	3.6	3	297.872	6.5	196.9	8		2.27	1060
0.158333	Male	283.624	160	18	651.688	45.4	1	6.4	17	4.1	2	382.979	3.8	200	14	3.81	2.57	876
0.166667	Female	717.167	16	63	278.653	45.4	11	7	15	1.1	2	638.298	3.5	192.2	0.1	3.31	2.49	584
0.172222	Female	409.101	48	18	746.07	30.25	1.4	6.4	17	0.1	2	787.234	1.4	116.6	0.4	5.56	2.9	287
0.175	Male	358.765	79	18	343.822	45.4	3.2	8.5		3.2	2	404.255	1	179.8	4.9	5.07		1050
0.188889	Female		81		429.215	45.4		5.8	17				3.1			1.88	1.95	311
0.194444	Male	1210	20	18	242.698	17.78	1.6	6.5	18	3.3	2	425.532	1.9	56.1	1.8	3.93	3.06	258
0.197222	Male	155.243	83	18	217.978	45.4	1.3	6.3	17	1.9	1	382.979	3.6	131.4	3.4	2.58	2.52	498
0.197222	Female	431.002	28	37	1040.45	35.98	7.8	7	16	0.5	3	446.809	1.8	153.2	0.1	2.98	3.21	421
0.205556	Female	496.1	23	18	507.867	45.4	2.4	7	15	0.1	1	595.745	2.7	145.7	0.1	2.52	2.62	711
0.211111	Male	215.259	160	18	952.813	45.4	1.3			3.3	2	851.064	3.6	200	12	3.89		309
0.213889	Female		79		730.34	45.4		8.3	20				2.3			2.26	3.53	728
0.219444	Female	247.445	280	18	683.149	31.45	4	7.6	18	0.1	2	595.745	1.5	200	0.1		3.35	201
0.266667	Female	599.555	51	44	200.001	45.4	5.1	8.6	18	0.3	3	659.575	2.8	157.8	0.1	4.44		296
0.286111	Female	29.645		18			8.2			0.7	2	872.341		73.6	0.1			238.4
0.297222	Female		520	18	566.294	45.4	5	5.8		0.2	3	297.872	2.2	159.3	0.1	1.62	2.24	721
0.302778	Female	72.842	250	18	220.226	45.4	5.2	7.1	20	0.9	1	361.702	3.1	90.9	0.1	3.74	2.66	579
0.319444	Male	205.821	83	18	13.4832	20.03	2.1	6.2	16	4.4	1	765.958	3.2	200	1.5	2.57	2.71	138
0.325	Male		380	18	49.4384	45.4	1	8.3	15	1.2	2	319.149	3.9	68.1	1	5.78		938
0.347222	Female	258.214	320	18	103.371	31.04	2.9	6.3	16	0.8	2	638.298	1.1	200	0.1	3.12	2.72	227
0.35	Male	148.346	150	18	429.215	45.4	1.5	7.6	17	0.9	1	297.872	1.6	200	1.6	1.05	2.86	267
0.355556	Male		120	18	411.238	45.4	1.2	6.5	15	1.3	1	297.872	0.8	199.6	1.9	2.97	2.22	876
0.366667	Male	126.324	220	18	208.99	45.4	1.2	7.1	16	2.5	1	340.426	1.4	200	2.4	1.76	2.74	116
0.375	Female		97		35.9552	36.06		8.1	16				1.2			2.75	2.91	309
0.394444	Female	76.714	110	18	611.238	45.4	9.8	7.5	21	0.1	1	191.489	2.6	200	0.1	4.44	2.26	778
0.413889	Male	84.579	90	18	125.843	45.4	1.1	7.5	19	5	1	468.085	1.9	200	10	1.54	3.62	948
0.416667	Female	83.369	250	18	833.711	45.4	22	7.4	17	0.2	1	446.809	1.6	168.5	0.1	3.72	3.36	721
0.416667	Female	241.153	560	18	253.934	45.4	6.3	5.6	22	0.1	2	1191.49	2.8	200	0.1		1.87	430
0.422222	Female	333.96	240	18	42.6968	45.4	4.4	7.5	17	0.1	1	404.255	2	200	0.1	1.88	3.01	321
0.427778	Female		200	43	87.6408	45.4	2.4	7.1		0.1	1	595.745	5.8	200	0.1	2.76	2.5	607
0.433333	Male	191.059	170	18	312.361	45.4	0.7	6.7	19	0.8	1	212.766	3.2	107.1	0.1	3.59	2.52	1260
0.438889	Female	110.957	400	18	186.518	45.4	4		23	0.1	2	106.383	2.2	156.6	0.1	3.13	3.39	971
0.452778	Female		880	18	310.114	41.65	4.3	6.2	19	0.4	1	234.043	2.2	91.4	0.1	2.79	2.8	185
0.463889	Male		60	18	217.978	45.4	0.6	6.1	18	0.8	1	1361.7	7.5	113.5	0.4	3.52	2.33	999
0.469444	Male	150.161	180	18	44.944	39.82	0.7	7.3	19	1.4	1	319.149	2.7	194.3	0.1	2.47	2.51	149
0.488889	Female		190	18	80.8992	45.4	2	6.7	15	0.2	1	297.872	5	200	0.1	3.62	2.33	1070
0.502778	Male	39.325	270	18	164.046	45.4	0.7	7.4	16	0.3	2	297.872	2.9	85.4	0.1	2.54	3.14	275
0.508333	Male	30.25	120	18	130.338	45.4	1.5	7.4	17	0.5	1	574.468	1.2	147.3	0.1	6.47	3.22	418
0.513889	Male	70.664	95	18	62.9216	36.13	0.8	6.2	16	1.1	1	361.702	1.8	184.3	0.1	5.65	2.25	220
0.513889	Female	43.923	230	25	226.967	45.4	2.5	7.5		0.1	1	574.468	1.6	200	0.1	5.19	2.68	580
0.519444	Male	39.809	140	18	130.338	32.84	1	6.8	16	0.4	1	617.021	0.9	171.1	0.1	3.04	2.63	247
0.527778	Female	37.51	150	18	173.034	45.4	2.9	7.6	20	0.1	1	361.702	2.4	97.7	0.1	3.06	2.65	1120
0.533333	Female	39.083	200	18		27.56	21	8.2	19	0.4	1	127.66	2.4	200	0.1	1.76	3.57	256
0.533333	Female			18		35.77			16	0.1	2	106.383	1.9	40.8	3.4			368
0.547222	Male		340	18	166.293	27.04	2	7.3	16	1.2	2	425.532	0.9	200	0.2		2.71	194
0.572222	Male	34.969	100	18		45.4	2.7	6.6	19	0.6	1	127.66	2.6	200	0.1	3.29	2.54	860
0.575	Male	27.104	160	18	85.3936	45.4	0.6	7.9	19	0.2	1	255.319	2.5	155.4	0.1	6.45	2.83	551
0.597222	Male	17.303	340	18	240.45	39.6	0.8	5.9		0.9	1	234.043	9.1	157.1	0.1	1.51	2.81	376
0.6	Male	13.552		18			0.8	8	19	1.7			5.2			5.16
0.608333	Male	14.641	200	18	49.4384	45.4	0.4	7.9	16	1.3	2	212.766	1.4	168.4	0.8	1.13	3.39	1170
0.625	Male	15.246	110	18	242.698	45.4	0.7	6.5	16	0.6	1	170.213	2.5	104.6	0.1	2.06	3.34	358
0.638889	Female	21.659	250	18	283.147	45.4	4.5	7.2		0.2	2	234.043	3.6	129.3	0.1	3.04	2.65	547
0.641667	Male	19.36	140	18	31.4608	43.26	0.5	6.8	18	0.5	1	191.489	2.5	144.9	0.1	4.22	2.38	302
0.647222	Female	45.133	150	18	96.6296	45.4	3.3	8.6	21	0.1	1	361.702	4.3	200	0.1	7.84	3.1	247
0.666667	Female	20.328	190	18	152.81	45.4	4	6.5	19	0.1	1	319.149	2.9	166	0.1	1.59	2.64	676
0.669444	Male	24.926	190	18	40.4496	45.4	1	5.9	17	0.3	1	255.319	2	166.4	0.1	2.43	2.32	1160
0.677778	Female	5.929	160	18	44.944	35.13	3.6	6.8	17	0.1	1	170.213	5.6	153.8	0.1	0.86	2.67	111
0.683333	Male	61.226	110	18		35.09	0.7	6.8	15	0.2	1	127.66	1.9	153	0.1	2.64	3.53	266
0.694444	Male	21.538	150	18	238.203	45.4	0.5	7.8	18	0.5	1	1765.96	1.4	174.4	0.1	2.66	2.72	636
0.725	Male	20.086	86	18	193.259	34.24	0.7	6.8	18	0.6	1	170.213	1.7	200	0.1	3.96	2.69	209
0.738889	Male	58.08	78	18	139.326	45.4	0.6	5		0.2	1	106.383	1.8	144.5	0.1	5.01	2.02	429
0.758333	Female		220		35.9552	34.55	3.5	4.8	19	4.5	10	404.255	2.5	53.6	0.8	0.91		137
0.786111	Male	25.531	250	18	44.944	43.49	1.5	6.3	16	0.5	1	255.319	2.2	200	0.1	3.94	2.52	171
0.786111	Female	48.158	180	18	69.6632	45.4	2.2	6.9	21	0.1	1	595.745	1.4	200	0.1	5.16	2.55	1210
0.819444	Female	26.62	67	18	125.843	45.4	3.3	7.2	15	0.2	1	276.596	2	200	0.1	3.23	2.49	515
0.830556	Male	4.598	120	18	80.8992	28.73	0.6	6.6	16	0.1	1	276.596	2.3	127.4	0.1	2.07	2.71	232
0.838889	Female	27.346	68	18	164.046	45.4	4.2	6.9		0.2	1	595.745	2.7	200	0.1	2.34	2.17	516
0.844444	Male	3.509	100	18	204.495	37.89	0.9	7.9	18	0.4	1	234.043	2.4	138	0.1	3.91		229
0.858333	Female	30.129	120	18	92.1352	45.4	4.1	6.2		0.2	1	553.192	3.8	200	0.1	4.85	1.86	572
0.863889	Male
0.897222	Female	24.684	250	18	71.9104	45.4	12	6.7	22	0.4	1	191.489	3.4	200	0.1	2.43	2.25	257
0.9	Female	36.058	140	18	44.944	45.4	6.7	6.8	19	0.4	1	361.702	2.8	200	0.1	5.2	2.43	659
0.913889	Female	19.239		18			2.4			0.1	13	340.426		192.9	0.1			732.4
0.919444	Female	4.598	370	18	80.8992	45.4	5.9	5.1	15	0.3	1	212.766	3.2	170.8	0.1	4.17	2.03	417
0.922222	Male		340		208.99	45.4	1.3	5.5	18	1.5	3	234.043	5.2	200	0.9	2.86	2.21	682
0.936111	Female		540		164.046	45.4		7.2					2.8			5.33	2.66	615
0.938889	Female	20.691	88	18	56.18	45.4	2.4	6.5	15	0.1	1	446.809	1.4	157.6	0.1	2.48	2.75	294
0.944444	Male	11.132	150	18	85.3936	45.4	0.3	6.2	15	0.2	1	234.043	1.7	200	0.1	3.23	2.15	872
0.944444	Female	10.164	520	18	58.4272	45.4	3.8	6.9		0.1	2	425.532	6.1	131.4	0.1	5.23	2.35	308
0.963889	Male	14.399	140	18	44.944	45.4	0.4	6.2	16	0.2	1	702.128	2.4	166.7	0.1	2.53	2.26	293
0.977778	Male	8.228	200	18	31.4608	45.4	0.2	6.6	17	0.2	1	148.936	3.6	200	0.1	2.8	2.47	407
0.988889	Female	13.189	610	18	173.034	42.55	2.4	6.9	20	0.1	1	234.043	3.2	133	0.1	1.14	2.97	194
0.997222	Female	73.689	300	18	107.866	45.4	5.9	7.3	20	0.1	1	340.426	1.1	85.5	0.1	2.53	2.72	964
1.00833	Female	6.05	250	18	83.1464	45.4	7.5	5.5	21	0.5	1	404.255	3.3	187.6	0.1	2.99	2.53	1180
1.02222	Male	79.013	360	18	67.416	45.4	0.6	6.1	17	0.2	1	255.319	2.1	193.8	0.1	3.81		632
1.05833	Female	15.246	52	18	125.843	37.92	4.4	5.7	15	0.3	1	297.872	3.2	127.5	0.1	3.26	2.52	853
1.09167	Female	1.331	330	18	78.652	45.4	2.5	6.6	19	0.1	1	170.213	1.4	165.7	0.1	2.77	2.28	949
1.17222	Male	6.776	290	18	244.945	38.48	0.3	5.1	16	0.4	1	148.936	1.9	102.6	0.1	1.96	2.78	498
1.21111	Female	8.228	190	18		32.11	2.7	5	15	0.1	1	446.809	1.6	162.8	0.1	2.89	2.48	542
1.53611	Female	2.541	370	18	49.4384	39.75	4.6	4.7		0.1	2	510.638	1.3	200	0.1	2.44	2.26	390
1.65833	Male	4.598	130	18		45.4	0.8	4.1	16	0.3	1	361.702	7.8	200	0.1	3.71	2.99	486
1.74167	Female	21.538	150	18		45.4	2	6.4	14	0.1	1	234.043	1.6	200	0.1	5.4	2.08	1480
1.74722	Female	2.299	160	18	76.4048	45.4	7.9		19	0.1	1	170.213	2.8	90.9	0.1	2.94	2.24	793
1.78333	Female	0.968	63	18	58.4272	45.4		6.3	22	0.5	1	297.872	4	159.5	0.1	2.8	2.88	749
1.81111	Male	1.815	450	18		45.4	0.3	5.3	17	0.1	1	446.809	2.8	200	0.1	1.58	2.06	303
1.86944	Male	2.299	250	18	33.708	17.29	0.3	5.2	13	0.1	1	191.489	1.9	95.4	0.1	2.75	2.84	1130
1.9	Male	1.452	180	18	44.944	23.46	0.3	5.9	20	0.1	1	212.766		200	0.1	3.15	1.86	1100
1.91111	Male	1.694	200	18	40.4496	41.59	1.8	6.4	17	0.2	1	255.319	4.6	193.2	0.1		3.26	352
1.93056	Female	4.719	98	18	76.4048	23.34	5	7.6	15	0.1	1	212.766	1.8	200	0.1	3.39	3.07	525
1.93611	Male	2.662	220	18	51.6856	26.78	0.4	4.3	22	1.4	1		7	200	0.1	1.71	2.66	425
1.96111	Male	3.146	290	18	33.708	45.4	1	3.7	17	0.1	1	170.213	2	197	0.1	3.22	3.28	315
1.97778	Female	8.349	190	18	62.9216	26.89	3.6	5.7	17	0.1	1	382.979	3.1	175	0.1	5.38	2.5	395
1.98333	Male	2.541	120	18	51.6856	36.78	1.8	5.3	20	0.3	1	170.213	2.1	121.1	0.1	2.03	2.76	976
2.01111	Male	2.42	140	18	56.18	45.4	1.2	6.4	17	0.1	1	212.766	2.9	137.1	0.1	2.14	2.33	743
2.06944	Male	1.331	320	18		13.55	0.6	4.6	16	0.4	1	425.532	4.2	169.2	0.1	5.57	2.52	582
2.15833	Female	2.42	180	18	44.944	34.32	2.9	6	18	0.1	1	191.489	3.5	159.7	0.1	1.38	2.31	511
2.24444	Female	4.477	160	18	112.36	34.89	3	5.5	16	0.1	1	255.319	2.8	67.6	0.1	2.44	2.56	511
2.24444	Female	0.968	200	18	166.293		5.2	6.3	19	0.1	1	191.489	2.2	111	0.1	2.33	2.66	1380
2.28333	Male	1.694	260	18	44.944	38.16	1.1	4.9	20	0.2	1	297.872	1.9	77.5	0.1	3.59		1130
2.325	Male	16.335	250	18	33.708	45.4	1	5.8	16	0.1	1	148.936	2.6	105	0.1	3.35	2.37	344
2.44722	Male	7.139	310	18	87.6408	45.4	0.7	6.6	21	0.4	1	212.766	3	200	0.1	3.39	2.52	367
2.66389	Female	2.541	160	18	29.2136	24.01	2.8	7	15	0.1	1	361.702	1.5	162.6	0.1	1.63	2.81	1160
2.67778	Male	5.203	120	18		16.77	1.4	6.2	18	0.2	1	468.085	3.8	158.3	0.1	2.98	1.99	562
2.69167	Female	1.331	320	18	38.2024	32.06	2.8		20	0.1	1	170.213	2	89.8	0.1	1.22	2.69	673
2.73889	Female	6.413	66	18	49.4384	45.4	3.4	4.3	19	0.2	1	382.979	3.5	200	0.1	3.6	2.56	652
2.76111	Female	5.082	240	18		29.61	2.1	6	16	0.1	1	148.936	1.7	200	0.1	2.39	1.97	978
2.79444	Female	1.694	200	18	76.4048	37.91	2.3	6.7	15	0.1	1	85.1064	1.3	200	0.1	1.88	2.92	820
2.8	Male	1.936	200	18		21.29	1	5.8	13	0.1	1	127.66	1.2	98	0.1	1.89	2.43	981
2.91111	Male	1.331	340	18	65.1688	45.4	0.2	6.4	18	0.1	1	191.489	1.4	136.4	0.1	1.64	2.4	1480
2.91111	Male	1.21	310	18	47.1912	45.4	0.5	6.8	17	0.1	1	234.043	1.6	200	0.1	2.82	2.58	986
2.91944	Male	0.847	85	18	80.8992	45.4	1.2	5.1	20	0.1	1	127.66	1.5	167.3	0.1	2.31	2.25	1060
2.975	Female	1.331	81	18	186.518	45.4	1	6.9		0.1	1	170.213	2	124.8	0.1	1.28	2.51	440
3.04167	Male	3.63	140	18	58.4272	45.4	1.7	6.5	19	0.3	1	148.936	5.3	167.7	0.1	2.14	2.33	422
3.06111	Female	1.21	330	18	42.6968	45.4	3.3	5.2	19	0.1	1	297.872	1.4	131.9	0.1	2.91	3.13	730
3.06389	Male	2.662	330	18		45.4	0.4	5	14	0.1	1	361.702	2.4	164.4	0.1	1.35	2.59	895
3.09444	Female	0.847	200	18		34.4	2.9	6.8	19	0.1	1	85.1064	2.1	166.4	0.1	4.32	2.74	582
3.125	Female	2.057	180	18	58.4272	45.4	2.1	7.3	18	0.1	1	170.213	4.3	200	0.1	4.23	2.5	832
3.15278	Male	0.605	420	18	78.652	45.4	0.6	5.1	18	0.1	1	382.979	3.6	148.8	0.1	1.41	2.36	1110
3.17222	Male	1.936	190	18	114.607	45.4	2	7.1	15	0.1	1	170.213	2	57.8	0.1	1.89	2.17	413
3.28611	Female	0.847	120	18	85.3936	45.4	2.9	5.6	15	0.3	1	148.936	3	65	0.1	1.65	2.78	708
3.46944	Male	2.178	210	18	26.9664	29.49	0.9	6.4	17	0.2	1	191.489	2.5	127.9	0.1	4.04	2.55	1180
3.48056	Female	1.21	210	18	96.6296	45.4	1.4	5.1	15	0.1	1	170.213	1.5	200	0.1	2.2	2.3	391
3.49167	Male	0.968	220	18		45.4	0.3	5.3	18	0.1	1	212.766	3.8	194.3	0.1	2.32	2.81	945
3.55	Female	1.21	200	18	69.6632		4.4	5	18	0.1	1	127.66	2	200	0.1	1.94	2.36	740
3.69444	Male	2.299	220	18	105.618	15.55	1.6	6.7	14	2.5	1	212.766	2	165.1	0.1	1.99	1.69	572
3.72222	Female	3.025	180	18	132.585	35.14	1.2	5.4	15	0.1	1	106.383	1.8	140.3	0.1	3	2.04	819
3.77222	Female	0.847	210	18	60.6744		2.3	5.1	14	0.1	1	489.362	1.6	198.9	0.1	1.82	2.19	613
3.78056	Female	2.178	62	18	31.4608	34.2	3.1	6.5	16	0.1	1	191.489	3.5	200	0.1	4.34	2.62	420
3.82222	Male	3.025	96	18	47.1912	45.4	0.7	7.2	17	0.1	1	148.936	1.2	54.1	0.1	1.05	1.98	533
3.9	Male	1.452	130	18	92.1352	41.25	0.8	6.4	15	0.1	1	85.1064	1.4	169.3	0.1	1.81	2.21	1090
3.91111	Male	2.42	190	18	26.9664	45.4	0.5	5	18	0.1	1	382.979	2.8	144.6	0.1	2.71	2.37	1360
3.96944	Female	4.84	200	18	103.371	45.4	1.5	6.4	18	0.1	1	170.213	2.2	144.8	0.1	3.67	2.79	1110
3.98056	Female	1.573	180	18	78.652	42.02	2.6	7.9	19	0.1	1	170.213	2.6	191.6	0.1	1.54	2.18	541
4.00556	Male	1.089	190	18		33.95	0.5	6.3	16	0.1	1	255.319	3.6	200	0.1	2.22	2.14	996
4.01944	Female	3.267	380	18	60.6744	45.4	2.1	6.2	19	0.1	1	170.213	5.1	176.8	0.1	1.51	2.15	494
4.08056	Male	7.623	240	18	47.1912	42.57	1.6	5.7	16	0.2	1	148.936	4.3	125.6	0.1	3.76	2.9	524
4.30278	Female	1.089	110	18	67.416	45.4	1.6	7.3	16	0.1	1	340.426	3.8	92.7	0.1	2.72	2.49	517
4.31667	Male	0.968	78	18	71.9104	40.47	0.9	6.5	17	0.1	1	382.979	5.7	76.6	0.1	1.6	2.68	433
4.38333	Male	1.815	100	18	83.1464	45.4	0.7	6.4	15	0.1	1	234.043	4.2	101.7	0.1	2.69	2.56	880
4.45833	Male	2.42	280	18	49.4384	45.4	1.4	7.5	16	0.1	1	85.1064	3.2	200	0.1	2.82	2.8	362
4.46944	Male	1.21	150	18	150.562	45.4	1.2	7.1	22	0.1	1	106.383	1.7	161.8	0.1	2.38	2.71	930
4.51111	Male	3.146	180	18	42.6968	44.08	1.8	6.4	15	0.1	1	212.766	1.9	142.1	0.1	2.58	2.45	693
4.54722	Female	5.203	140	18	33.708	36.01	1.3	5.8	16	0.1	1	297.872	1.8	89.2	0.1	2.43	2.31	803
4.62222	Female	5.082	200	18	69.6632	45.4	2.5	6.4	15	0.1	3	85.1064	2.4	161.8	0.1	2.47	2.37	359
4.64722	Female	0.847	320	18	44.944	41.07	2.5	6	17	0.1	1	297.872	2.3	150.4	0.1	3.31	2.25	953
4.675	Male	0.847	250	18	80.8992	45.4	1.3	6	18	0.1	1	148.936	1.8	196.8	0.1	4.44	2.41	676
4.71389	Female	2.541	66	18	92.1352	45.4	1.8	4.6	17	0.1	1	234.043	2.1	94.9	0.1	3.76	2.09	939
4.72222	Male	1.694	200	18	143.821	42.86	0.8	6.5	16	0.1	1	170.213	2.3	121.5	0.1	2.24	2.77	520
4.77222	Female	1.331	170	18	80.8992	45.4	0.7	6.2	20	0.1	3	127.66	1.4	122.9	0.1	1.69	2.13	604
4.80278	Female	0.968	190	18	65.1688	45.4	1.8	6.2	17	0.1	1	85.1064	1.2	198.6	0.1	2.21	2.28	1180
4.93056	Male	0.726	120	18	89.888	43.64	0.2	7.1	17	0.1	2	63.8298	2.3	200	0.1	1.17	1.97	397
4.975	Female	3.509	160	18	107.866	45.4	0.9	6.2	15	0.1	1	85.1064	4	106	0.1	2.46	2.5	693
4.98889	Female	3.146	140	18	65.1688	45.4	2.6	5.9	20	0.1	3	85.1064	2.6	79.4	0.1	2.19	2.11	683
5.02778	Female	1.694	320	18	139.326	43.39	0.8	7.3	17	0.1	1	127.66	2.8	114.3	0.1	4.25	2.08	581
5.13611	Female	3.872	250	18	40.4496	28.3	2.5	6.6	14	0.1	1	191.489	4.9	200	0.1		1.96	594
5.18056	Male	0.847	170	18	186.518	45.4	0.4	6.2	15	0.1	1	361.702	1.6	85.8	0.1	3.4	2.38	498
5.20278	Female	1.452	150	18	58.4272	43.14	1.3	6.9	17	0.1	2	212.766	3.6	159.4	0.1	2.9	2.54	1140
5.21389	Female	1.694	240	18	47.1912	45.4	1.4	5.3	16	0.1	1	297.872	3.2	167.4	0.1	2	2.16	940
5.275	Female	2.541	280	18	78.652	44.51	2.4	6.8	16	0.1	1	170.213	2.6	134.6	0.1	2.75	2.38	561
5.3	Female	2.904	140	18	69.6632	44.91	0.9	7.3	18	0.1	2	63.8298	2.2	122.9	0.1	1.15	2.4	545
5.34722	Male	1.573	290	18	121.349	45.31	0.5	5.7	14	0.1	1	106.383	2.4	200	0.1	2.77	2.04	504
5.39722	Male	1.573	60	18	89.888	42.25	0.5	6.6	16	0.1	1		2.8	158	0.1		2.56	805
5.45833	Male	1.331	250	18	87.6408	45.4	0.4	6.4	16	0.1	1	106.383	2.2	200	0.1	1.98	2.6	788
5.475	Female	0.605	220	18	134.832	39.19	2	7.7	17	0.1	1	106.383	1.9	132.2	0.1	2.23	2.81	1060
5.54444	Female	1.331	75	18	141.574	45.4	2	6.6	16	0.1	1	85.1064	2.9	190.8	0.1	2.95	2.02	772
5.59167	Male	1.331	90	18	56.18	43.79	0.7	5.1	16	0.1	1	148.936	3.8	149.1	0.1	2.83	1.98	556
5.61667	Male	2.541	140	18	71.9104	40.81	0.7	5.8	16	0.1	2	170.213	2.9	85.8	0.1	3.33		507
5.71111	Male	1.089	230	18	116.854	45.4	0.7	6.9	14	0.1	1	106.383	2.7	116	0.1	3.18	2.13	443
5.73611	Female	2.178	160	18	98.8768	31.03	2.4	7.8	16	0.1	1	531.915	4.1	162.4	0.1	2.59	2.21	759
5.83889	Male	0.605	120	18	58.4272	45.4	0.1	6.2	17	0.1	5	42.5532	1.8	57.8	0.1	2.03	1.97	414
5.88611	Male	3.146	190	18	69.6632	43.8	0.4	5.7	18	0.1	1	170.213	2.8	200	0.1	1.92	2.12	421
5.98333	Male	6.292	360	18	53.9328	33.15	1.2		16	0.1	1	361.702	3.2	50.1	0.1	3.24	2.46	712
5.99722	Female	0.726	110	18	161.798	45.4	1.6	7.1	17	0.1	1	212.766	2.3	140.6	0.1	3.22	2.4	571
6.00278	Male	2.299	400	18	51.6856	45.4	0.5	6.5	15	0.1	1	85.1064	3	154.4	0.1	2.7	2.54	555
6.01111	Male	1.694	190	18	114.607	45.4	0.3	5.7	17	0.1	1	148.936	2.1	127.5	0.1	2.22	2.61	531
6.23056	Female	6.292	270	18	65.1688	45.4	1.8	6.5	16	0.1	1	404.255	2.7	146	0.1	4.76	2.18	876
6.275	Male	1.331	220	18	123.596	45.4	0.6	7.8	16	0.1	1	276.596	2	126.7	0.1	1.12	2.56	461
6.31944	Male	1.089	150	18	80.8992	45.4	0.5	6.7	14	0.1	1	170.213	3.3	200	0.1	3.56	2.32	366
6.46111	Male	1.089	110	18	132.585	45.22	0.3	7.2	20	0.1	1	148.936	3.3	187.3	0.1	1.66	2.26	702
6.46667	Female	1.331	200	18	51.6856	45.4	1.9	6.9	17	0.1	1	446.809	4.1	81.5	0.1	2.13	2.09	550
6.63889	Female	2.42	320	18	58.4272	45.4	1.4	6.6	18	0.1	1	148.936	2.5	129	0.1	1.77	2.16	429
6.68056	Male	0.605	170	18	112.36	45.4	0.3	6.2	18	0.1	1	148.936	2.8	122.8	0.1	2.36	2.47	518
6.80833	Female	1.331	200	18	83.1464	45.4	1.6	6.7	14	0.1	1	191.489	2.1	200	0.1	4.73	2.47	431
6.91667	Male	0.968	240	18	87.6408	45.4	0.7	6.4	17	0.1	1	191.489	1.8	176	0.1	3.21	2.26	821
6.96111	Male	1.694	320	18	87.6408	45.4	0.6	7.2	17	0.2	1	106.383	2	200	0.1	2.18	1.7	604
7.08056	Male	0.605	140	18	89.888	25.29	0.4	6.3	17	0.1	1	191.489	3.8	159.8	0.1	3.39	2.53	950
7.09722	Male	1.21	320	18	92.1352	45.4	0.3	5	17	0.1	1	85.1064	7.4	200	0.1	2.66	2.11	817
7.17222	Male	0.847	79	18	53.9328	45.4	0.6	6.3	20	0.1	3	63.8298	2.1	47.2	0.1	1.64	2.04	336
7.23889	Female	0.968	80	18	80.8992	41.65	0.8	7.4	18	0.1	1	148.936	3.7	115.5	0.1	1.26	2.07	341
7.3	Male	0.726	150	18	62.9216	42.04	1.4	5.8	16	0.1	1	106.383	1.5	150.9	0.1	2.73	2.27	466
7.30556	Male	1.089	260	18	65.1688	45.4	1.1	6.9	18	0.1	2	148.936	3.3	144.2	0.1	1.75	2.14	632
7.41389	Female	1.936	180	18	123.596	41.31	0.9	6.7	14	0.1	1	170.213	3.4	104.5	0.1	1.08	2.02	649
7.41944	Female	0.847	210	18	224.72	22.51	1.9	5.3	19	0.1	1	127.66	6.8	116.1	0.1	1.45	2.19	255
7.42778	Female	1.694	330	25.96	148.315	45.4	1.2	5.7	17	0.1	1	170.213	3.5	197.6	0.1	4.28	1.91	567
7.48056	Male	1.21	150	18	76.4048	45.4	0.3	7	14	0.1	1	106.383	2.8	200	0.1		2.36	349
7.52222	Female	0.847	440	18	179.776	45.4	2	5.4	17	0.1	1	361.702	2.5	130	0.1	1.54	2.44	1130
7.75	Male	0.605	230	18	143.821	45.4	0.5	6.9	15	0.1	1	106.383	3.4	200	0.1	2.35	2.03	460
7.775	Male	1.331	130	18	47.1912	42.62	0.5	6.7	16	0.1	3	63.8298	1.4	72.9	0.1	1.34	2.3	395
7.81944	Female	1.089	150	18	69.6632	45.4	2	7.2	17	0.1	1	234.043	2	176.6	0.1	1.49	2.21	1170
7.82778	Female	1.089	120	18	87.6408	45.4	1.7	6.4	15	0.1	3	127.66	2.6	119.1	0.1	1.16	1.92	493
7.85278	Female	1.21	130	18	76.4048	45.4	1	6.8	18	0.1	1	148.936	2.9	200	0.1	2.73	2.34	640
7.88611	Female	0.605	200	18	101.124	45.4	1.1	6.3	16	0.1	1	148.936	2	52.6	0.1	1.44	2.76	481
7.95278	Male	1.452	240	18	65.1688	45.4	2.8	5.5	17	0.1	1	148.936	1.7	200	0.1	1.34		498
7.99167	Male	0.605	150	18	76.4048	45.4	0.6	6.3	17	0.1	1	106.383	1.7	200	0.1	2.84	2.14	660
8.07222	Male	0.726	160	18	146.068	45.4	0.5	6.1	16	0.1	1	617.021	1.2	194	0.1	4.1	2.09	720
8.14444	Female	1.331	110	18	148.315	45.4		6.6	17	0.1	3		3.5	48.7	0.1	1.49		428
8.17778	Male	1.089	260	18	123.596	45.4	0.4	6.6	14	0.1	1	85.1064	2.7	83.7	0.1	1.77	2.19	300
8.19167	Male	1.089	410	18	56.18	45.4	1.3	7.1	18	0.1	1	148.936	4.5	113	0.1	1.69	2.18	730
8.19167	Male	0.726	93	18	143.821	45.4	1		14	0.1	1	148.936	4.2	173.2	0.1	1.99	2.13	499
8.25	Female	2.178	110	18	114.607	45.4	1.5	6.8	13	0.1	1	297.872	5.6	186.1	0.1	3.97	2.08	337
8.26389	Male	0.968	130	18	76.4048	45.4	0.5	6.1	15	0.1	2	191.489	1.8	67.9	0.1	1.5	2.15	638
8.425	Male	0.968	230	18	71.9104	45.4	1.1	6.2	16	0.1	1	212.766	2.6	164.6	0.1	2.37	2.08	282
8.43333	Male	0.847	90	18	193.259	45.4	0.6	5.2	20	0.1	1	63.8298	1.9	111.5	0.1	1.94	1.99	309
8.44722	Male	1.089	130	18	155.057	45.4	1.3	6.2	17	0.1	1	148.936	2.1	200	0.1	4.1	2.37	479
8.48611	Male	0.847	410	18	101.124	45.4	1.8	5	19	0.4	1	234.043	2.5	190.8	0.1	3.52	1.82	508
8.61111	Female	1.331	150	18	98.8768	41.65	2.4	5.5	15	0.1	1	127.66	2.9	143.5	0.1	1.39	1.76	472
8.64444	Male	0.847	160	18	80.8992	45.4	0.4	5.1	15	0.1	1	170.213	2	25.1	0.1	1.87	2.54	551
8.64444	Female	0.968	90	18	67.416	45.4	1	6	14	0.1	1	148.936	5.3	136.3	0.1	3.83	1.95	268
8.73889	Male	1.089	140	18	69.6632	45.4	0.5	4.9	17	0.1	1	148.936	1.5	154.2	0.1		1.78	623
8.77778	Male	2.057	160	18	105.618	45.4	0.6	5.7	18	0.1	1	42.5532	3.1	158	0.1	1.24	1.81	348
8.77778	Female	1.089	150	18	105.618	45.4	0.9	6.6	21	0.1	2	170.213	5.3	197.3	0.1	2.7	1.98	495
8.79167	Female	0.605	200	18	98.8768	45.4	1.2	6.6	16	0.1	1	319.149	4	79.8	0.1	4.49	2.35	380
8.84722	Female	0.726	120	18	94.3824	45.4		6.6	17	0.1	1	170.213	3.3	186.9	0.1	3.12	1.97	455
8.93333	Female	0.605	97	18	89.888	45.4		7.8	17	0.1	1	191.489	4.8	153.6	0.1	1.53	2.07	512
9.02778	Female	0.605	140	18	96.6296	45.4	0.9	7	17	0.1	2	127.66	5.4	137.8	0.1	1.87	1.9	377
9.05	Female	0.726	130	18	76.4048	45.4	1.6	6.9	16	0.1	1	127.66	2.2	128	0.1	2.22	2.71	768
9.28611	Female	1.694	320	18	191.012	45.4	1.7	5.2	18	0.1	1	319.149	3	130	0.1	3.14	2.1	583
9.30278	Male	0.726	220	18	166.293	45.4	1	7.4	19	0.1	2	63.8298	1.4	200	0.1	1.81	2.49	444
9.325	Male	1.452	160	18	83.1464	45.4		5.4	16	0.1	2	170.213	3.3	76.4	0.1	1.37	2.37	403
9.33333	Female	0.605	320	18	58.4272	45.4	1.2	5.6	21	0.1	1	276.596	2.2	98.4	0.1	1.23	2.32	572
9.36944	Male	0.726	390	18	112.36	45.4	0.3	6.8	17	0.1	2	255.319	3.2	88.1	0.3	1.85	2.3	762
9.37222	Male	0.605	77	18	98.8768	45.4	0.9	5.2	15	0.1	1	191.489	2.1	80	0.1	4.52	2.18	367
9.40833	Male	0.605	270	18	85.3936	45.4	0.8	6.1	18	0.1	2	63.8298	2.6	129.4	0.1	1.74	1.63	656
9.43889	Female	1.089	68	18	98.8768	45.4	0.2	6.9	17	0.1	1	170.213	2		0.1	3.87	2.02	439
9.45278	Female	1.089	120	18	105.618	45.4	1.7	6.9	18	0.1	2	170.213	2.2	50.7	0.1	2.3	2.37	246
9.48056	Male	0.605	160	18	173.034	45.4	0.4	7.5	17	0.1	1	106.383	5.1	128.1	0.1	1.94	2.34	461
9.48333	Female	0.968	250	18	85.3936	45.4	1.2	6.7	18	0.1	1	170.213	4.1	150.2	0.1	1.81	1.85	617
9.5	Female	0.605	170	18	105.618	45.4	1.7	6.9	20	0.1	1	340.426	3.2	162.1	0.3	2.14	2.14	610
9.50833	Male	2.541	190	18	87.6408	45.4	2.1	5.7	15	0.1	1	106.383	2.9	126.4	0.1	2.47	2.1	553
9.53611	Female	1.089	420	18	179.776	45.4	2	6.1	17	0.1	2	617.021	1.7	157.6	0.1	3.38	2.14	651
9.65833	Male	0.968	250	18	130.338	45.4	1	6.1	15	0.1	1	234.043	1.4	130.2	0.1	3.78	2.03	278
9.66667	Female	0.605	210	18	83.1464	45.4	1.1	5.7	19	0.1	1	212.766	1.1	155.8	0.1	1.69	2.19	611
9.66667	Female	0.605	250	18	89.888	45.4	2.3	6.7	18	0.1	1	361.702	2.2	121.1	0.1	3.56	2.35	517
9.73333	Female	1.815	380	18	96.6296	45.4	1.5	7.4	14	0.1	1	234.043	2.3	200	0.1	2.03	2.73	420
9.73611	Male	1.21	130	18	74.1576	45.4	1.2	6	17	0.1	1	170.213	2.7	99.1	0.1	1.53	2.15	590
9.76389	Female	0.726	250	18	128.09	45.4	1.6	6.8	16	0.1	1	255.319	3.3	162.7	0.1	2.07	1.86	597
9.81667	Male	2.42	280	18	98.8768	45.4	0.7	5.9	16	0.1	2	106.383	2.6	117.2	0.1	2.83	2.64	351
9.85278	Male	1.331	180	18	29.2136	40.63	1.1	5.9	15	0.1	1	63.8298	3.3	85.9	0.1	2	2.11	487
9.86389	Female	0.605	90	18	65.1688	45.4	1.5	6.3	19	0.1	1	170.213	3.6	133.8	0.1	3.54	2.28	518
9.91111	Male	0.726	320	18	217.978	45.4	0.7	7.1	15	0.1	1	127.66	3.5	172.8	0.1	2.48	1.94	448
9.92222	Male	0.847	190	18	92.1352	45.4	0.8	7.1	15	0.4	3	85.1064	1.8	195.9	0.1	2.22	2.26	459
10.05	Male	0.605	120	18	116.854	45.4	1.4	6.7	16	0.1	1	85.1064	2.2	92.4	0.1	1.87	2.18	408
10.0611	Female	1.452	230	18	170.787	45.4	3.1	6	18	0.5	1	85.1064	5		0.4	2.3	2.4	387
10.1167	Male	1.936	200	18	132.585	45.4	0.8	6.4	16	0.1	1	106.383	4	99.5	0.1	1.64	1.89	492
10.1333	Female	1.089	200	18	114.607	45.4	2.1	5.5	16	0.1	1	382.979	3.2	96.2	0.3	2.63	2.05	654
10.2417	Female	0.726	250	18	51.6856	42.62	3.1	5.4	17	0.1	1	170.213	3.1	187.3	0.1		2.08	657
10.2611	Female	2.42	240	26.61	137.079	38.78	2.2	7.4	15	0.1	2	63.8298	3	66	0.2	2.92	2.05	399
10.4639	Female	1.089	120	18	137.079	45.4	2.2	6.3	18	0.1	1	340.426	4	134.1	0.1	2.37	1.65	517
10.5389	Male	0.847	250	18	128.09	45.4	0.4	7.8	17	0.1	1	127.66	3	200	0.1	2.3	1.99	335
10.5472	Female	2.541	400	72.57	78.652	45.4	5.1	6	15	0.5	1	191.489	2.4	63.8	0.1	3.98	1.71	590
10.5556	Male	2.904	140	18		43.79	0.8	6.4	15	0.1	2	63.8298	1.9	116.6	0.1	4.08	1.74	350
10.5833	Female	2.178	150	101	155.057	45.4	4.5	6.2	14	1.3	1	85.1064	4	93.3	0.4	2.62	2.05	293
10.6333	Female	1.089	280	18	67.416	45.4	1.4	6.6	14	0.1	1	127.66	3.9	117.4	0.1	3.16	2.18	339
10.7833	Male	1.21	210	18	148.315	45.4	1.3	6.8	17	0.1	1	212.766	1.4	100.8	0.1	2.37	2.24	562
10.8083	Female	2.42	88	18	96.6296	45.4	1.1	6.3	15	0.1	1	148.936	2	144.6	0.1	3.15	2.08	327
10.825	Female	3.388	350	80.42	53.9328	45.4	2.8	6.9	16	0.1	2	170.213	6.3	200	0.4	2.11	1.98	320
10.8417	Female	1.573	170	263	89.888	45.4	7	6.5	18	4.4	1	212.766	6.2	50.2	0.1	1.81	2.33	413
10.8972	Female	0.968	170	18	78.652	45.4	2.4	6	14	0.1	1	553.192	3.3	120.9	0.1	3.71	2.12	735
10.9056	Female	1.936	120	18	155.057	45.4	2.7	5.9	21	0.1	3	85.1064	2.6	200	0.1	1.77	2.3	635
10.9222	Male	0.605	82	18	105.618	39.61	1.9	6.9	13	0.5	1	170.213	2.7	200	0.1	3.49	1.83	423
10.9556	Male	1.694	180	18	110.113	39.88	1.2	7.3	16	0.1	1	148.936	2.3	115.3	0.1	3.93	1.98	702
10.9778	Female	1.089	240	18	112.36	45.4	2.6	5.6	17	0.1	1	255.319	4.4	91.9	0.1	5.19	1.91	623
10.9778	Female	0.726	270	18	80.8992	45.4	2.1	6.2	17	0.1	1	106.383	2.6	144.5	0.1	3.59	1.89	816
11.0278	Female	0.605	170	18	60.6744	45.4	1.1	6.2		0.1	1	148.936	1.4	144.3	0.1	2.21	3.02	453
11.075	Female	0.968	340	18	116.854	45.4	1.8	6.6	14	0.1	2	297.872	5	142.1	0.1	3.43	2.16	630
11.1	Male	1.815	220	18	159.551	45.4	1.8	5.8	18	0.7	1	234.043	2.2	127.5	0.8	4.81	2.67	1320
11.1417	Female	0.726	280	53.54	78.652	45.4	5.9	6.4	17	1.6	1	297.872	2.8	42.3	0.2	3.3	2.57	398
11.15	Female	2.662	220	133	112.36	45.4	5	5.3	12	4.2	1	106.383	6.6	109.1	0.6	1.33	2.37	1130
11.1556	Male	2.299	240	18	42.6968	45.4	0.8	5.1	19	0.1	1	382.979	3.6	101.7	0.1	3.05	2.18	969
11.1889	Female	0.726	160	139	24.7192	45.4	4.5	6.2	14	1	1	85.1064	5.6	66.2	0.3	2.34	2.17	261
11.2139	Female	0.847	210	43.92	148.315	45.4	3.4	4.7	17	0.1	1	191.489	1.3	161	0.1	2.32	2.85	770
11.3083	Female	1.331	180	18	98.8768	45.4	1.9	6.6	16	0.1	1	340.426	4.1	151.6	0.1	3.53	2.27	581
11.3833	Male	1.936	170	36	83.1464		2.6	5.5	19	1.1	2	127.66	3.9	27.5	4.4	1.41	2.82	510
11.3861	Male	0.726	150	18	110.113	45.4	1.1	6.9	16	0.3	1	382.979	2.8	131.7	0.2	1.35	2.5	533
11.3889	Female	0.726	100	124	105.618	45.4	5.4	5.9	12	2.8	1	170.213	10.6	57.9	0.2	1.65	2.52	410
11.4	Female	3.388	180	59.77	110.113	45.4	7.2	6.3	16	3.4	1	127.66	6.1	105.8	0.1	2.16	2.32	262
11.4222	Male	0.968	310	18	74.1576	45.4	2	7.3	15	0.1	1	276.596	4.2	132.9	0.1	3.85	2.12	340
11.4389	Male	0.968	180	18	123.596	45.4	2.2	8	16	0.7	1	148.936	3.5	129.3	1.1	1.44	2.03	353
11.45	Male	1.089	240	18	103.371	45.4	2.1	6.2	17	1	1	127.66	3	200	0.5	2.18	1.59	569
11.4667	Female	1.452	270	18	69.6632	45.4	1.6	5.7	18	0.1	2	170.213	4.1	104.6	0.1	3.98	2.09	624
11.4944	Male	0.605	240	18	128.09	45.4	2.1	7.8	16	0.2	1	148.936	2.4	117.2	0.1	1.5	2.33	456
11.5028	Male	0.968	200	18	69.6632			5.8	15	1.3	1	85.1064	3.3	60.1	4.6	2.75	2.42	396
11.5056	Male	2.299	52	18	119.102	45.4	0.5	6.5	15	0.1	1	170.213	2.6	174.6	0.1	4.05	2.39	459
11.5083	Male	2.178	170	18	125.843	45.4	4.1	4.8	18	0.9	1	148.936	3.1	65.8	2.6	1.68	2.43	894
11.5194	Male	1.452	150	18	94.3824	45.4	2.6	6.3	16	1.1	1	127.66	4.8	57	0.3	3.53	1.94	641
11.5194	Female	1.089	260	245	67.416	45.4	6.2		14	4.4	2	446.809	3.1	107.4	0.7	2.83	1.73	661
11.5222	Female	1.331	220	106	96.6296	45.4	4.9	6.3	15	5.4	1	297.872	9.9	116.3	0.2	4.32	2.12	355
11.5389	Male	0.726	140	18	164.046	45.4	2.9	5.6	18	0.2	1	297.872	4.1	112.4	0.1	1.82	1.73	695
11.55	Female	1.573	170	187	87.6408	45.4	6.5	6.2	13	2.3	1	127.66	3.6	108.3	0.2	1.72	2.42	575
11.5583	Female	0.968	290	18	53.9328	45.4	1.4	6.2	17	0.1	1	212.766	4.3	97.4	0.1	2.17	1.92	466
11.5972	Female	1.936	120	93	92.1352	45.4	5.4	6.8	13	4.5	1	85.1064	6.8	119	0.7	1.69	2.71	296
11.6139	Male	0.847	310	18	87.6408	41.77	1	7.8	14	0.1	1	255.319	2.3	200	0.1	3.06	2.14	245
11.6639	Female	0.605	220	91.36	62.9216	45.4	5.5	5.3	15	3.8	1	276.596	4.5	33.4	0.7	2.37	1.96	473
11.6722	Female	4.356	160	176	195.506	45.4	4.5	7	16	1.7	1	276.596	5.3	65.9	0.2	4.9	2.4	578
11.6778	Male	0.605	250	18	152.81	45.4	2.1	6.5	13	1	1	148.936	3.2	97.7	0.2	2.24	2.43	377
11.7222	Male	0.726	82	18	184.27	45.4	5.9	7.2	17	1.1	1	63.8298	2.9	82.1	0.7	4.34	1.7	602
11.7278	Female	1.089	170	37	123.596		4.9	5.3	17	0.4	1	170.213	5.7	141.2	0.4	4.18	2.24
11.7306	Female	1.936	200	102	98.8768	37.51	4.5	7.2	16	0.6	1	191.489	3	186.7	0.2	1.97	2.16	430
11.7361	Male	0.968	320	18	105.618	45.4	1.4	6.6	18	0.8	3	191.489	2.3	112	0.8	2.38	2.47	589
11.7417	Female	1.573	250	88.44	276.406	45.4	4.7	6.4	17	0.3	1	106.383	2.3	68.7	0.2	1.49	1.87	651
11.7444	Female	2.057	160	70.87	87.6408	45.4	3.3	6.7	13	1.2	1	191.489	2.4	110.2	0.1	5.01	1.89	418
11.7472	Male	0.847	230	18	31.4608	45.4	1.3	7	17	0.8	1	191.489	3.1	161.7	0.1	1.22	2.73	849
11.75	Male	2.783	92	18	213.484	45.4	1.8	6.5	17	1	1	106.383	2.7	169.8	0.1	4.25	2.14	487
11.7528	Male	1.089	80	18	71.9104	45.4	1.6	5.5	15	0.1	1	106.383	4	91.9	0.1	2.75	1.99	702
11.7694	Female	1.452	230	71.58	62.9216	39.51	3.2	5.3	15	0.8	2	63.8298	5.4	67.8	0.2	2.1	2.26	426
11.8	Male	0.968	100	18	85.3936	45.4	1.8	4.6	16	0.1	1	170.213	2.9	61.1	0.1	2.38	2.22	326
11.8583	Female	1.21	260	18	123.596		2.2	6.7	15	1.2	1	340.426	3.3	69.5	0.1	2.05	2.55	408
11.8639	Male	2.178	160	18	112.36	45.4	1.3	4.9	18	0.6	1	85.1064	3.8	127.6	0.1	1.35	1.89	354
11.9139	Female	4.961	230	18	87.6408	43.78	1.8		15	0.1	1	148.936	3.2	167.2	0.2	2.21	2.46	517
11.9167	Male	1.21	110	18	114.607	45.4	1.1	5.7	13	1.3	1	319.149	3.7	114.1	1	1.52	2.26	332
11.9222	Male	1.331	210	18	83.1464		0.8	5	16	0.6	1	85.1064	4.4	118.4	0.1	3.05	2.77	226
11.9444	Female	2.662	310	32.6	128.09	45.4	3.4	7.4	16	0.2	2	425.532	1.7	118.1	0.4	2.74	2.43	569
11.9556	Female	2.178	230	140	40.4496		5.3	5.3	14	7.6	1	212.766	4.9	98.1	0.4	1.99	1.89	245
12.0222	Female	0.605	180	153	177.529	45.4	4.7	6.7	15	0.7	1	191.489	4.2	106.3	0.3	4.12	2.45	535
12.025	Female	3.267	350	267	161.798	45.4	4.9	7.4	13	5.4	1	234.043	2.8	64.2	0.5	1.81	1.79
12.025	Female	1.573	170	18	85.3936	45.4	0.9	6.8	17	0.1	1	106.383	6.6	142.7	0.1	3.08	1.89	288
12.0278	Male	0.605	140	18	112.36	45.4	1.2	6.6	15	0.1	1	148.936	5.8	126.5	0.1	3.71	1.7	488
12.0417	Female	0.968	100	49.52	191.012	45.4	1.5	6.5	15	0.1	1	106.383	5.9	61.6	0.1	1.67	2.42	477
12.0611	Male	1.452	130	18	60.6744	45.4	2.5	6.7	14	1.4	1	148.936	2.8	42	1.1	1.27	2.27	483
12.0722	Female	1.331	120	53.46	53.9328	30.23	3.2	6	16	2	1	191.489	3.6	96.4	0.2	2.02	1.99	874
12.1361	Female	1.815	100	19.1	139.326	45.4	4.2	6.1	13	1	1	212.766	2.2		0.2	2.98	2.58	708
12.1417	Female	2.783	210	18	161.798	45.4	1.1	6	14	0.1	1	234.043	5.7	81	0.2	2.78	2.43	538
12.1806	Male	0.605	180	18	130.338	45.4	3.1	7.4	14	0.6	1	106.383	2.6	85.3	0.2	1.49	1.93	733
12.1972	Female	0.847	190	159			4.7	4.6	15	6.6	1	127.66	5.9	75.9	0.5	2.33	2.26	469
12.2083	Female	0.726	230	176	44.944	45.4	4.5	6.3	14	4.8	2	148.936	4	81.3	0.9	1.58	2.35	350
12.2361	Male	0.968	220	18	53.9328		3.9	4.9	15	0.7	3	106.383	2.4	39.3	0.7	3.26	2.14	354
12.2611	Male	0.605	240	34.89	74.1576	45.4	3.6		14	2.2	2	340.426	3.8	32.9	2.3	2.1	2.32	293
12.2611	Male	1.089	360	59	110.113	40.22	4.3	7.9	17		2	468.085	5.8	24.5	3.8	1.28	2.51	413
12.2833	Male	1.573	150	18	60.6744	45.4	2.9	5	15	0.9	1	148.936	3.1	40	0.3	3.44	2.27	535
12.3056	Male	0.605	290	18	224.72	30.54	2.9	6.8	19	0.9	3	127.66	4.7	86.9	0.3	1.7	1.46	926
12.3389	Male	1.815	180	18	87.6408	45.4	3.2	4.9	17	1	1	106.383	4	37.5	1.2	1.4	2.46	645
12.3889	Male	0.726	210	18.4	114.607	40.32	0.9	5.8	19	0.1	2	42.5532	3.4	31.5	0.1	2.76	2.1	481
12.3972	Female	0.847	170	150	175.282	45.4	7	6.6	12	7.3	1	319.149	4.9	58.8	0.5	5.84	2.02	736
12.4306	Male	0.968	100	18	85.3936	45.4	1.4	6	16	0.1	1	170.213	3.8	109.7	0.1	1.11	2.14	661
12.4528	Male	0.847	120	36.09	94.3824	27.12	2.2	6.2	18	0.1	2	63.8298	4.2		0.1	1.59	1.65	567
12.4667	Female	1.573	230	18	179.776	41.49	2.8	6.9	16	0.1	1	85.1064	2.3	140.4	0.4	2.54	2.72	386
12.475	Female	1.21	310	22.63	78.652	31.49	5.3	6.9	15	1.8	1	212.766	4.1	129.4	0.1	2.53	2.09	477
12.5556	Male	1.452	290	18	65.1688	45.4	1.7	6.6	15	1	2	85.1064	3.2	104.2	0.4	3.01	2	467
12.5611	Male	0.847	140	18	94.3824	45.4	1.3	8	14	0.4	1	148.936	6	51.6	0.1	1.25	2.35	590
12.6167	Female	1.573	340	181	96.6296	45.4	6.6	7.2		5.4	1	276.596	3.6	101.8	0.9		1.76	553
12.6444	Female	1.815	120	214	89.888		4.1	5.1	15	3	1	127.66	8	141.4	0.4	2.62	2.35	382
12.65	Female	2.541	190	66	130.338	45.4	11	6.4	14	2.8	1	85.1064	3.8	72.2	0.4	1.43	2.38	619
12.7139	Female	2.178		160	107.866	45.4	8	5.2	16	3.8	1	404.255	2.6	102.2	0.3	3.51	2.35	449
12.7361	Male	1.089	290	53.26	56.18	44.29	2.9	7.2	14		1	212.766	1.5	33.5	12	1.24	1.97	416
12.8139	Male	0.605	200	18	125.843	45.4	1.4	5.9	16	2.1	1	127.66	4.1	76.6	3.5	2.85	2.49	344
12.8417	Male	0.605	380	18	67.416	45.4	2.1	5.7	15	2.2	2	42.5532	2.6	112.2	3.5	1.38	1.98	381
12.8417	Male	0.726	400	18	69.6632	45.4	2	6.4	17		2	42.5532	2.7	109.1	3.6	1.35	2.11	359
12.8472	Male	1.694	260	18	103.371	45.4	1.7	6	15	0.6	1	148.936	2.8	57.7	0.1	1.95	2.49	392
12.875	Female	2.299	140	99	101.124	45.4	4.7	5.7	13	3.9	1	255.319	3.3	69.3	0.4	3.45	2.35	557
12.8806	Male	0.605	160	18	105.618	45.4	0.9	6.2	15	0.5	1	319.149	2.7	108.9	0.7	2.73	2.61	465
12.8833	Female	2.42	170	76.95	71.9104	45.4	5.5	6.2	14	2.6	1	148.936	3.3	66.7	0.4	2.36	1.58	548
12.9139	Female	0.605	200	99	107.866	45.4	3.7	4.7	13	1.1	2	85.1064	1.6	42.8	0.4		2.04	383
12.9389	Female	1.21	190	62	42.6968		7.7	7.2	16	9.1	2	106.383	2.9	79.9	0.3	1.53	2.42	484
12.9444	Male	0.726	200	28.71	58.4272	45.4	1.8	5.4	13	0.7	3	85.1064	5.2	32.9	1	1.07	2.33	591
12.9528	Male	1.21	190	18	134.832	45.4	2.4	6.2	14	0.7	1	255.319	3.1	74.3	2.8	2.7	2.74	300
13.05	Male	2.42	300	64.11	87.6408	45.4	1.3	7.6	14	1.3	1	127.66	3.4	93.2	13	2.75	2.06	395
13.0694	Female	0.605	260	131	40.4496	45.4	4.5	4.5	14	6.8	2	191.489	2.7	58.4	0.6	1.92	2.52	433
13.0722	Female	1.936	210	93	85.3936	45.4	1.8	4.8	15	0.8	1	127.66	2.6	59.5	0.6	1.83	1.96	411
13.1028	Female	2.057	260	18	94.3824	45.4	2	6.6	18	0.1	1	425.532	3	94.1	0.1	3.36	2.12	559
13.1278	Male	1.089	140	18	101.124	45.4	1.3	6.2	14	1.1	1	127.66	2.4	49	0.5	2.34	2.26	464
13.1889	Female	1.089	150	64.75	49.4384	45.4	3.5	6.2	17	1.8	1	191.489	1.9	94.1	0.4	1.69	2.41	800
13.225	Female	1.694	300	208	83.1464	38.32	1.3	6.4	14	0.8	8	127.66	3.5	17.2	0.3	1.57	1.67	263
13.2389	Male	2.178	350	18	65.1688	45.4	1.2	5.9	17	1.1	2	127.66	3.3	110.1	0.4	1.74	1.86	448
13.2444	Male	1.089	160	18	148.315	45.4	3.6	6.9	16		1	106.383	6.3	100.1	3.8	2.21	1.91	596
13.2833	Male	2.178	300	47.12	78.652	45.4	5.2	6.8	15		1	234.043	3.1	70.3	8.4	3.3	1.93	625
13.2889	Male	2.42	110	18	71.9104		1.4	5.2	17	1.2	1	127.66	5.5	77.6	5.2	1.63	2.26	238
13.2917	Female	1.089	150	60	58.4272		7.7	5	15	1.5	1	234.043	2.2	34	0.1	1.71	1.74	643
13.3028	Male	1.089	190	71.46		41.12	7.1	5.2	15		1	276.596	2.2	50.6	7.6	1.17	2.06	603
13.3083	Male	0.968	160	18	101.124	45.4	1.4	5	16	0.8	1	148.936	3.9	92.2	0.5	3.13	2.09	635
13.3222	Female	0.726	180	78	38.2024	45.4	2.4	7.3	19	0.9	5	361.702	3.9	102.8	0.1	4.03	2.39
13.3389	Female	1.573	390	136	58.4272	45.4	4.4	7	16	6.9	1	446.809		87.9	0.9	2.14	2.03	649
13.4278	Male	0.605	100	18	107.866	39.2	2.1	5.8	14	0.9	1	191.489	3.3	154.1	0.1	5.69	2.54	447
13.4611	Female	0.726	210	105		45.38	5.8	6.8	16	5.3	1	212.766	2.3	77.3	0.6	2.03	1.83	917
13.475	Female	1.21	260	189	65.1688	24.61	4.4	6.6	15	11	1	234.043	5.2	46.3	0.6	2.33	1.87	402
13.5361	Male	2.904	160	71	89.888		1.6	6.7	14		1	212.766	3.7	25.7	11	1.49	2.31	514
13.5472	Male	0.968	210	18	85.3936	25.14	4.8	7.4	16		1	148.936	6.7	71.9	1.2	2.15	2.32	476
13.5722	Male	1.331	230	18	38.2024	45.4	3.9	6.4	16	1.8	2	148.936	4.3	98.9	2.7	1.39	2.3	299
13.6056	Female	1.936	220	102	56.18	45.4	5	6	17	5.6	2	255.319	5.8	32.4	0.4	1.45	2.01	242
13.6111	Female	1.573	240		83.1464	45.4	5.1	7.1	18	12	2	297.872	3	35.8	0.5		1.93	498
13.6139	Male	0.605	140	55.8	49.4384	39.34	5.5	6.4	15		2	148.936	2.7	59.1	6.5	2.01	2.31	253
13.6611	Female	0.968	280	62.45	148.315	45.4	3.6	7.1	18	0.9	1	531.915	3.8	45.3	0.8	1.93	2.16	743
13.7167	Female	2.057	180	190	244.945	45.4	4.3	6.2	21	9.4	1	297.872	2.7	46.2	1	1.48	2.11	558
13.7944	Male	2.783	440	18	274.158	45.4	2	6.7	18	1.5	2	297.872	1.7	200	1.1	5.26	2.06	301
13.8639	Female	1.21	200	209	164.046	45.4	7.4		19	3.4	1	148.936	4.6	163	0.2	1.42	2.26	474
13.875	Female	1.936	270	90	175.282	45.4	6.6	7.2	15	1.3	1	127.66	2.5	78.9	0.5	1.22	1.61	302
13.8806	Male	0.726	140	24.18	112.36	45.4	2.5	7.5	15	1.3	1	85.1064	3.5	45.6	3.2	1.45	2.1	370
13.9083	Male	2.541	180	27	83.1464	17.55	3.2		15		1	319.149	5	39.2	4.2	1.4	2.8	347
13.9139	Male	0.847	180	18	49.4384	45.4	1.2	4.3	14	1.1	2	85.1064	3.3	124.8	1.5	1.6	1.94	444
13.9667	Male	2.057	410	57	35.9552		2.8	5.3	17		1	297.872	1.7	21.7	14		2.64	504
14.0222	Male	2.662	150	18	226.967	45.4	2	5.9	16	1.9	1	148.936	2.4	69	1	1.68	2.55	430
14.05	Male	0.847	120	64.48	51.6856	23.45	3.9	6.5	17	2.4	3	85.1064	6.9	49.9	5.1	0.91	2.23	401
14.0583	Female	1.21	110			45.4	8.7	7.6	17	26	1	340.426	5.2	63.2	0.3	2.22	1.78	318
14.1528	Male	3.993	130	43	107.866	39.71	3.1	6.8	14	2.9	1	85.1064	6.9	40.7	12	1.27	2.44	294
14.1889	Female	0.847	270	228	49.4384	40.96	2.2	5.8		0.6	16	170.213	1.9	66.6	0.5		1.64	346
14.2972	Female	1.331	420	139	137.079	45.4	4.7	7.1	12	13	2	255.319	3.4	24.1	1.1	2.71	2.31	459
14.3056	Female	2.057	180	531		21.89	9.1	7	17	33	1	234.043	2.2	30.6	0.5	3.01	1.74	218
14.3111	Male	1.21	230	62	67.416	20.86	7.6		16	8.8	2	170.213	8.8	78.5	24	4.33	2.15	351
14.4167	Female	0.847	190	129	74.1576	45.4	3.3	6.4	15	1.1	4	148.936	4.2	40	0.8	1.82	1.69	274
14.4472	Male	2.057	280	55	119.102	25.59	3.4	6.2	18	2.5	1	234.043	2.1	50.2	11	4.29	2.32	600
14.5	Female	0.605	380	119	112.36	45.4	5.6	6	20	6.9	5	127.66	1.8	59.6	1.4	1.41	1.9	352
14.625	Female	1.21	180	305	137.079	40.61	0.8	7.6	13	0.9	14	404.255	2	85	0.2	1.74	1.54	463
14.6333	Male	0.968	310	55.7	107.866	36.15	2.7	5.8	17	1.3	3	106.383	3.4	34.3	12	3.51	2.14	380
14.6361	Female	1.21	180	1270	35.9552	26.5		6.1	18		3	382.979	3.2	47.6	1.2		2.18	375
14.6667	Male	1.452	140	65.7	112.36	12.16	5.8	7.1		3.8	4	85.1064	3.3	39.3	24	1.37	1.56	306
14.6861	Male	3.388	130	33	87.6408	45.4	3.7	6.3	15	3.7	1	148.936	4.9	70.1	9.4	1.12	2.37	480
14.7139	Female	0.605	250	864		44.09	6.3	5		27	3	148.936	6.4	49.1	1.5	3.03	1.47	217
14.7306	Male	0.605	170	68.72	121.349	17.81	1.9	6.6	21	2.5	3	63.8298	5.3	32.6	14	2.73	1.59	528
14.7611	Male	0.605	200	33	51.6856	34.13	2.5	6.7	14	1.1	2	255.319	7.4	59.4	0.5	1.87	2.48	450
14.7639	Female	1.331	350	140	56.18	43.41	6.5	6.6	16	2	3	191.489	4.8	37.2	0.9	1.42	1.75	328
14.8639	Female	2.057	570	38	89.888	45.4	0.9	5.8	19	1.8	2	531.915	2.3	103.1	1.6	0.83	2.41	257
14.9139	Female	0.726	190	182	132.585	45.4	4.4	6.7	14	6.8	2	148.936	4.2	73.4	0.8	1.21	1.57	626
14.9306	Female	7.018	180	334	42.6968	39.3	2.1	5.8	17	1.9	20	148.936	4.3	61.9	0.3	1.23	1.9	199
14.95	Male	1.331	480	166	110.113	40.57	3.6	7.7	17	7.9	2	170.213	5.4	45.1	28	1.6	1.96	225
14.95	Male	1.815	370	43	112.36	31.71	4.4	6.5	18	4.1	1	319.149	4.1	33.4	9.4	2.03	1.77	214
15.0056	Male	1.573	250	18	69.6632	45.4	3.2	7.4	18	1.4	1	148.936	2.6	56.1	2.6	3.11	2.15	432
15.0056	Male	1.694	130	29.21	69.6632	45.4	2.5		16	3.9	1	170.213	3.7	57	3	1.5	2.82	470
15.0056	Female	1.694	250	484	42.6968	33.98	1.4	6.5	16	0.5	17	170.213	2.6	57.8	0.7	1.37	1.5	405
15.0444	Female	0.726	360	301	269.664	31.31	1.4	7.6	20	1	23	127.66	2.3	28.1	1.8	1.4	1.58	621
15.0472	Male	1.331	290	90	166.293	25.31	7.9	6.7	18	7.7	1	595.745	1.9	44.2	13	3.48	1.82	390
15.0778	Male	0.847	330	105	89.888	45.4	3.8	7.5	22	3.2	4	170.213	2.4	31.4	19	3.4	1.89	520
15.0917	Female	1.21	340	59.87	179.776	45.4	4.7	6.2	16	4.6	1	361.702	5.7	39.5	1.5	3.86	1.83	475
15.0944	Female	0.726	310	208	80.8992	32.64	4.3	6.2	17	9.2	19	553.192	1.3	61	0.8	1.44	2.06	432
15.1167	Male	1.21	230	59.1	110.113	45.4	3.9	7.1	18	4	1	297.872	2.7	24.2	8.9	1.94	1.85	842
15.1278	Female	1.331	340	128	168.54	45.4	5.4	7.2	20	5.9	2	148.936	6	73.7	0.7	2.3	1.51	738
15.1389	Female	3.146	200	118	62.9216	35.02	6.5	6.5	15	7.8	2	170.213	3.6	23.7	1.3	2.05	1.43	693
15.1639	Male	1.21	300	45.66	130.338	34.27	2.4	6.5	16	3.4	1	276.596	3.2	39.9	20	1.95	1.72	286
15.1667	Female	1.331	160	175	112.36	45.4	4	7.9	14	9.3	8	170.213	2.1	56.9	0.4	1.4	1.66	338
15.2278	Female	1.936	260	399	168.54	45.4	3.9	6.8	17	12	11	276.596	2.3	52.9	1.3	1.4	1.82	427
15.2278	Female	2.299	93	286	92.1352	37.07	5.6	6.2	16	5.2	1	170.213	1.9	67.8	0.8	1.46	1.43	388
15.2472	Male	1.089	140	27.9	33.708	45.11	3.9	7.4	12	5.8	1	127.66	7.1	36.9	5.1	2.19	1.88	391
15.2528	Female	1.936	310	216	49.4384	45.4	3	6.8	15	1	7	148.936	2.1	89.4	1.1	1.58	1.5	382
15.2667	Female	1.089	170	242	4.4944	30.89	6.9	6.5	18	11	2	170.213	5.6	55.9	1.2	1.16	1.66	437
15.2694	Male	0.847	310	72	96.6296	29.3	1.8		20	2.4	2	148.936	2.4	40.6	19	2.52	1.87	304
15.2778	Female	3.872	160	210	53.9328	45.4	5.2	6.5	17	5.1	1	127.66	2.1	72	1.2	1.06	1.83	510
15.2778	Female	1.089	100	316	78.652	45.4	1.3	5	17	0.3	21	191.489	5	123.8	0.4	2.35	1.71	270
15.3056	Female	0.968	440	99	159.551	45.4	7.8	6.4	14	7.4	1	361.702	3.4	68.7	0.4	1.7	2.4	307
15.3167	Female	0.605	310	218	141.574	36.11	6.3	6.3	18	8	1	404.255	1.2	117	0.6	1.17	2.2	349
15.3361	Male	2.904	170	54	123.596	44.07	3.3	5.6	18	2.8	1	212.766	4.3	54.8	6.8	2.1	1.85	287
15.3389	Female	2.299	200	142	130.338	45.4	7	8.5	16	8.8	1	255.319	2.5	67.8	0.8	3.9	1.59	366
15.3694	Female	0.847	250	207	49.4384	45.4	6	7.4	17	10	2	255.319	5.6	31.5	1.2	0.84	1.72	485
15.4167	Male	1.573	210	18	420.226	45.4	2.5	5.5	16	2.9	1	319.149	2.2	14.6	5.4	2.98	1.86	312
15.4389	Male	1.694	180	97	83.1464	43.4	2.5	6.9	20	3	1	297.872	5.4	22.1	14	1.25	2.25	272
15.4667	Male	1.21	110	18	80.8992	45.4	2.9	6.5	12	1.1	1	234.043	6		0.2	1.94	1.89	413
15.4694	Female	9.075	190	430	213.484	24.13	1.2	7	17	2.1	18	276.596	3.1	118.3	1.2	3.31	1.65	407
15.4722	Male	1.21	330	18	283.147	32.65	2.8	6.9	17	5.4	1	212.766	1.3	26.7	16	1.79	1.83	283
15.5	Female	1.089	240	214	103.371	40.33	1.9	5.9	20	1	11	234.043	3	61.1	1.2	2.66	1.42	461
15.5083	Female	2.42	540	162	85.3936	45.4	7.9	5.6	16	5.6	2	531.915	2	63.9	1.2	2.81	1.75	378
15.5194	Male	1.21	210	36.4	168.54	37.04	1.3	5.5	16	2.6	1	319.149	2.9	44.1	12	1.1	1.45
15.55	Female	5.203	400	909	33.708	14.02	3.9	8.6	20	6.4	47	595.745	3.6	75.7	0.9	3.2	1.86	496
15.5694	Male	0.726	240	55.88	186.518	45.4	5.1	5.7	17	3.2	1	446.809	2.8	53.9	13	1.36	1.74	527
15.5722	Male	0.847	240	54.13	121.349	27.96	5.3	7.9	18	6.2	3	106.383	2.2	39	21	1.8	1.62	553
15.5972	Male	0.726	120	49.16	182.023	45.4	3.9	6.3	15	6	2	148.936	3.1	24.1	11	2.87	2.05	449
15.5972	Male	0.968	78	27.15	157.304	45.4	2.6	6.2	16	4.1	1	170.213	7.2	28.1	12	2.22	1.31	368
15.6111	Male	1.573	400	67.32	159.551	45.4	3.2	7	19	4.8	1	361.702	1.8	30	18	1.94	1.84	543
15.6583	Male	0.847	120	107	62.9216	24.18	2.7	5.9	17	2.5	3	106.383	4.2	29.3	20	2.06	2.09	433
15.6722	Female	2.299	330	515	78.652	45.4	2.8	7.4	14	6.8	17	468.085	2.8	54.6	1.4	3.14	2.45	315
15.7083	Male	0.847	370	46.76	177.529	45.4	2.4	7.7	15	5.9	1	255.319	3	37.4	5.8	3.38	1.72	403
15.7083	Male	3.267	210	75.4	110.113	31.64	2.3	7.5	21	3.2	1	255.319	2.8	38.2	18	1.06	1.21	394
15.7139	Male	1.573	210	49.98	47.1912	43.45	6.1	6.7	15	5.3	2	297.872	2.4	38.7	13	2.03	1.9	287
15.7139	Male	1.452	200	40	310.114	41.58	6.9	6.7	20	3	1	255.319	5.3	19.9	6.4	2.5	1.78	583
15.7944	Female	3.993	330	242	6.7416	19.9	6.3	7.8	17	4.5	3	212.766	8.1		1.5	3.48	1.76	178
15.8139	Female	0.968	180	216	51.6856	24.1	1.7	5.4	16	0.6	16	191.489	2.6	99.9	0.4	1.89	1.45	408
15.8222	Female	1.573	150	999	26.9664	45.4		5.5	20		3	510.638	2.3	116.9	0.9	2.03	1.9	395
15.8333	Female	2.541	120	146	83.1464	23.62	7.1	6.3	18	18	1	212.766	4	31.7	1.5	1.21	1.5	192
15.85	Female	1.21	170	223	67.416	45.4	5.8	7.9	16	3.8	1	255.319	3.1	66.1	0.6	2.33	1.55	470
15.8639	Female	1.21	230	83	110.113	29.8	5.1	6.7	17	1.8	1	148.936	2.5	54.5	1.6	0.99	1.78	982
15.8917	Female	0.847	200	97	56.18	41.61	2.2	7.2	16	1	1	170.213	3.1	50.5	1.3	1.86	1.37	484
15.9028	Female	1.21	220	143	168.54	45.4	6.5	7.2	19	6.7	1	255.319	2.4	59	1	2.36	1.64	444
15.9333	Male	0.968	280	72.83	101.124	45.4	2.4	5.9	17	4.7	1	276.596	3.1	32.3	18	2.84	1.97	314
15.9389	Male	1.452	250	79.89	186.518	45.4	3.2	5.2	17	3.8	1	127.66	2.5	35	15	1.11	2.01	495
15.9444	Male	3.751	270	147	56.18	45.4	2.4	8.2	17	4.8	8	276.596	5.2	36.7	3	0.91	2.06	275
15.9694	Female	0.968	150	243	157.304	21.69	8.9	6.8	15	2.5	1	170.213	3.5	128	0.7	1.88	1.36	320
15.9889	Male	1.21	410	33.34	386.518	45.4	2.1	7	15	8.4	2	212.766	2.6	18.6	13	2.84	1.42	275
15.9917	Male	1.694	250	57.84	134.832	45.4	2.4	5.8	17	3.5	1	319.149	1.9	29.9	13	0.9	1.98	310
16.0222	Female	0.968	230	254	128.09	45.4	2.3	6.6	15	16	20	212.766	2.1		0.8	3.13	1.84	389
16.0472	Male	1.331	270	61.71	224.72	33.49	3.1	6.4		4.5	1	276.596	2.9	55.6	19	3.61	2.27	464
16.0472	Male	0.968	170	59.46	105.618	45.4	2.4	6.6	19	2.8	1	148.936	3.4	43.2	18	1.32	1.78	552
16.0639	Male	1.331	210	53	87.6408	44.52	1.3	6.2	11	4.2	1	212.766	3.5	19.9	5	1.75	1.78	693
16.0944	Female	1.573	260	410	24.7192	45.4	4.9	5.7	17	3.5	1	319.149	6	100	0.4	1.48	1.46	344
16.1056	Male	1.815	150	145	137.079	40.18	4.2	5.2	15	7.2	1	170.213	3	40.8	24	3.49	2.41	439
16.1194	Male	0.968	300	113	249.439	45.4	2.7	6.2	19	6.7	1	148.936	1.3		27	2.24	2.31	506
16.1278	Male	1.573	170	52.57	96.6296	44.51	5.2	6.6	15	1.8	1	234.043	4.3	54.1	11	1.44	1.95	569
16.1333	Female	0.968	230	163	92.1352	45.4	6.7	6.8	17	4.2	1	297.872	2.2	45.7	1.5	1.52	1.75	354
16.1417	Male	0.605	150	63.98	114.607	45.4	1.9	6.2	18	8.5	1	212.766	3.4	45.5	21	1.72	1.57	446
16.1417	Female	0.968	180	317	65.1688	32.7	5.3	7.1	15	4.4	6	191.489	3.2	69.1	1	2.42	1.89	283
16.1556	Male	0.968	460	33.49	179.776	34.7	3.9	7.8	17	4.1	2	382.979	3.8	42	20	4.56	1.88	398
16.1694	Male	1.573	230	21.9	56.18	45.4	3.8	7.7	17	1.8	1	234.043	3.3	40.9	12	1.18	1.76	535
16.1806	Male	1.694	200	24.78	191.012	42.8	4	6.4	19	5.4	2	106.383	2.5	56.4	16	1.71	1.35	369
16.1833	Male	0.968	130	62.5	337.08	31.91	1.9	5.9	20	1.2	2	63.8298	4.7	37.9	16	1.63	1.4	323
16.1972	Male	2.057	200	124	139.326	25.76	2.8	7.1	19	3.6	1	340.426	3.1	18.6	11	1.65	1.43	479
16.225	Male	0.605	310	127	116.854	45.4	2.8	6.2	17	3	1	553.192	1.7	16.5	5.2	3.74	2.03	513
16.2472	Female	1.089	250	49.1	65.1688	24.5	3.6	7	22	5.5	5	170.213	2.4		1.1	1	1.4	333
16.2528	Male	1.089	280	48.61	328.091	45.4	3.3	5.8	17	5.8	1	170.213	3.3	19.6	8	2.15	1.73	680
16.3389	Female	0.605	440	116	15.7304		4.2	6	17	4.9	3	340.426	3.9	65.3	1.3	1.25	1.44	374
16.3528	Male	1.694	190	18	85.3936	45.4	2.3	6.1	15	1.9	1	106.383	3.5		3.1	2.17	2.29	347
16.3556	Female	4.84	140	506	26.9664	29.53	6.5	7.4	16	12	1	212.766	4.9	57.9	1.1	2.72	1.63	291
16.4222	Female	3.267	450		74.1576	36.18	3.3	7.5	16	1	1	297.872	1.9		0.5	4.09	1.97	318
16.425	Male	2.783	220	70.33	89.888	43.56	2.3	6.2	16	5.2	1	148.936	3.6	21	11	2.43	1.49	446
16.4444	Male	1.694	410	65	330.338	44.34	3.5	7.3		3	1	297.872	2	31.3	12			475
16.45	Female	0.605	220	227	173.034	36.54	1.9	7.1	16	5.7	7	234.043	2.2	40.1	1.5	1.93	1.58	377
16.4778	Female	1.21	230	539	24.7192	23.66	3.7	6.2	19	4.9	1	319.149	5.3	74.5	0.1	1.4	1.53	342
16.4833	Male	2.299	230	54	146.068	34.23	4	6.1	17	3	1	212.766	4.2	55.3	15	2.44	1.97	384
16.5	Male	4.114	300	81	96.6296	17.31	2.5	7.5	19	4.9	1	276.596	5.7	44	22	2.03	1.74	758
16.5194	Female	1.089	280	57	305.619	33.66	7.4	6.6	14	14	1	191.489	5.1	24.8	0.5	1.89	1.65	305
16.5778	Female	1.452	220	170	31.4608	29.05	5.2	6.5	15	10	1	148.936	2.6	47.1	0.8	1.61	1.7	354
16.6667	Female	3.509	170	226	33.708	45.4	6	8	15	9.1	1	191.489	2.5	43.4	1.2	1.91	2	540
16.6722	Female	2.904	340	285	76.4048	36.83	5.8	7	18	6.3	1	212.766	2.4	133.8	1.4	2.33	1.67	306
16.675	Female	2.057	120	291	4.4944	22.35	3.1	5.1	18	9.2	34	170.213	2.8	97.4	0.1	1.25	2.18	218
16.6972	Male	1.21	190	53	85.3936		3.1		16	5.7	1	276.596	2.4	28.9	14	1.61	2.47	351
16.7806	Female	1.089	340	602	35.9552	45.4	7.6	6.6	17	15	1	297.872	2.3	60.5	0.6	1.06	1.76	292
16.8139	Female	3.63	220	96	42.6968	45.4	1	5.6	17		3	106.383	3.6	42.1	0.5	1.38	1.42	387
16.8278	Female	1.331	190	207	17.9776		8.3	6	17	13	1	170.213	3.4	59.7	1.2	0.5	2.35	271
16.9083	Male	1.452	160	83	123.596	40.86	2.4	6.9	15	3	1	319.149	5.1	34.3	12	1.55	1.7	446
17.0194	Male	0.605	140	22	148.315			5.9	16	7.6	1	127.66	2.8	29.2	3.3	1.58	1.38	577
17.1056	Male	1.815	490	87	274.158	25.15	4.4	7.8	14	5.8	1	361.702	2	19.1	7.4	2.49	2.1	195
17.1194	Female	1.089	170	178	89.888	45.4	5.1	7.1	16	12	1	170.213	3	75.8	1.5	1.92	1.56	330
17.1222	Female	2.057	150	65	260.675	31.94	6.6	7.1	18	6.2	1	127.66	4.5	26.2	0.7	2.08	1.6	568
17.1361	Female	3.993	390	108	35.9552	40.17	5.9	5.7	17	4.2	1	127.66	4.7	24.1	1.6	0.43	1.61	206
17.1528	Female	0.605	300	170	74.1576	36.39	8.2	6.2	17	19	1	191.489	4.8	43.7	1	1.14	1.69	343
17.175	Male	1.089	240	134	195.506	25.32	3.4	6.2	20	4.1	1	148.936	2.4	40.7	25	0.77	1.69	298
17.1778	Male	0.847	110	18	134.832	32.29	3.9	6.2	18	2.2	1	297.872	4.1	19.3	3.4	2.46	1.74	310
17.1889	Female	5.203	170	132	80.8992	45.4	8.2	7.4	20	7.4	1	255.319	2.4	41.6	0.4	1.84	1.63	826
17.2139	Male	1.452	190	77	96.6296	32.5	2.4	7.5	18	8.6	1	361.702	3.6	43.8	13	1.22	1.84	484
17.2389	Male	1.089	160	71		31.59	1.5	6.8	18	3.4	1	255.319	2.9	45.8	9.7	1.17	2.1	322
17.2444	Female	0.605	390	427	56.18	44.6	3.2	6.1	19	7.9	38	574.468	1.8	89	1.1	0.73	1.82	310
17.3	Male	1.452	300	105	217.978	31.12	2.6		21	5.9	1	170.213	4.5	20.1	11	1.53	2.22	267
17.3056	Female	1.573	250	508	107.866	32.95	8.2	6.9	14	22	2	170.213	2.8	18.1	1.5	1.26	2.06	204
17.3278	Female	2.057	250	477	65.1688	29.36	2	7.5	19	9.4	24	680.851	3.2	62.5	1	3.56	1.9
17.3639	Male		200	131	164.046		4.7	6.3	17	4.5	1	170.213	2.8	29.2	23	0.83	1.69	532
17.3917	Male	1.331	370	82.06	179.776	38.89	2.2	6.6	19	6.2	1	276.596	3.5	48.8	24	1.83	1.52	366
17.4361	Female	10.406	180	589	98.8768	29.47	9.8	6.8	18		2	170.213	2	36.8	1.7	3.82	1.6	341
17.4417	Female	1.089	170	1130	110.113	45.4	1.4	5.6	15	3.1	58	361.702	1.9	105.1	1	1.32	1.76	184
17.4667	Female	1.573	290	145	303.372	38.91	6.8	7	19	18	1	276.596	2.5	29.3	2.3	0.96	1.6	522
17.5056	Female	0.605	290	254	35.9552	45.4	3.3	7.3	15	2.2	8	276.596	3	69.4	1	2	1.8	389
17.5083	Male	0.968	130	27	274.158	21.42	0.9	6.8	20	2.8	1	234.043	3.3	24.8	10	2.1	1.34	410
17.575	Male	1.694	320	72	78.652	45.4	2.4	6	19	5.2	1	319.149	4.3	34.9	11	3.15	2.08	457
17.5806	Male	2.057	240	69.51	226.967	29.88	3.5	5.3	21	2.6	1	127.66	3.6	36.4	20	0.97	1.73	452
17.6056	Male	0.605	340	97	155.057	45.4	2.2	5.5	14	4.5	3	297.872	2.3	55	20	1.91	1.68	412
17.6111	Male	7.018	320	69	231.462	42.46	2.2	7.9	21	3.2	1	191.489	7.4	16.5	13	1.97	1.36	430
17.625	Male	2.299	140	84.79	420.226	32.52	3.4	6.8	16	5.7	1	276.596	2.2	32	13	2.35	1.55	197
17.6528	Male	3.025	260	51.68	173.034	37.6	3.7	6.4	19	3.4	1	191.489	4.4	16.6	13	0.68	1.86	417
17.6583	Male	1.452	190	115	175.282	40.63	2.1	5.6	17	5.8	1	297.872	4.3	52.4	21	2.2	1.76	399
17.6944	Female	1.331	230	564	60.6744	40.84	4.5	7.9	19	7.7	9	170.213	3.5	51.3	2	0.62	1.26	370
17.6972	Male	1.452	210	84	260.675	45.4	3	7.5	23	4.6	1	297.872	2.2	54.7	17	1.34	2.03	436
17.7167	Female	1.089	180	115	58.4272	28.67	5	7	14	4.2	2	85.1064	3.8	47.5	1	1.27	1.19	331
17.7417	Female	2.299	200	304	26.9664	14.52	4.3	5.8	20	5.2	8	510.638	3.4	43.9	1.3	4.62	1.75
17.7722	Male	1.21	260	40.8	119.102	36.46	4.2	7	16	4.2	1	234.043	3.3	38.6	20	1.13	1.93	360
17.825	Female	0.968	250	825	92.1352	29.67	1.8	5.9	13	3.6	35	553.192	4.3	87.7	1.2	4.35	1.55	287
17.925	Female	0.605	450	62.03	200.001	38.19	0.4	7.2	16		1	255.319	4.5		0.5	2.87	2.45	440
18.0083	Female		200	132	58.4272		3.9	5.7	18	17	3	191.489	2.4	41.6	1.7	0.71	1.47	317
18.0111	Female	1.21	120	519	105.618	37.06	7.5	6.2	13	28	4	489.362	1.6	60.2	1.4	2.3	1.81	835
18.0278	Male		280	97	238.203		1.9	7.3	18	2.8	1	212.766	3.7	12.8	9.4	2.75	1.7	428
18.0444	Male	1.694	360	53.47	177.529	45.4	4.6	7	16	5.5	2	297.872	3.7	41.2	17	3.58	1.34	278
18.0444	Female		590	121	94.3824		6.8	5	16	6.8	2	659.575	2.6	66.5	2.1	1.42	1.88	498
18.0694	Female	1.936	410	166	42.6968	41.18	5.1	6.3	19	3.3	1	234.043	1.9	83.5	1.4	2.07	1.5	391
18.1361	Male	4.961	440	55.1	384.271	42.52	4.6	7.4	20	3.7	1	148.936	2.4	56.6	21	3.4	1.8	297
18.1972	Male	5.687	250	66.98	121.349	21.83	1.8	6.9	17	6.5	1	148.936	3.8	51.1	23	3.41	2.12	512
18.2833	Male		230			27.72		7			1	234.043		37.3	18			518
18.425	Female	1.936	550	135	128.09	32.89	6.2	7	15	3.1	1	319.149	2.5	66.2	1	2.13	1.49	299
18.5056	Female	0.847	360	111	71.9104	45.4	5.7	8.3	17	4.1	1	255.319	5	40.4	1.6	1.9	1.8	550
18.5111	Male	1.452	370	69.8	253.934	41.91	2	6.6	17	4.1	2	148.936	4.2	36.2	14	1.21		336
18.5722	Female		270	111	62.9216		5.4	5	17	18	1	234.043	3.4	82.8	1.4	1.83		452
18.6444	Female	0.847	140	126	26.9664		6.7	5.8	17	8.8	1	212.766	5.3	112.5	0.8	2.08	1.92	332
18.7222	Female	0.726	250	302	157.304	33.74	1.5	7.3	15	0.7	12	127.66	1.6	76	0.5	1.37	1.19	295
